# 1 Exploiting node metadata to predict interactions in large 2 networks using graph embedding and neural networks

3 Runghen Rogini<sup>1</sup>, Stouffer Daniel B<sup>1</sup>, and Dalla Riva Giulio V<sup>2</sup>

4 <sup>1</sup>Centre for Integrative Ecology, School of Biological Sciences, University of  
5 Canterbury, New Zealand

6 <sup>2</sup>School of Mathematics and Statistics, University of Canterbury, New  
7 Zealand

8 June 11, 2021

## 9 **Abstract**

10 Collecting network interaction data is difficult. Non-exhaustive sampling and com-  
11 plex hidden processes often result in an incomplete data set. Thus, identifying poten-  
12 tially present but unobserved interactions is crucial both in understanding the structure  
13 of large scale data, and in predicting how previously unseen elements will interact. Re-  
14 cent studies in network analysis have shown that accounting for metadata (such as  
15 node attributes) can improve both our understanding of how nodes interact with one  
16 another, and the accuracy of link prediction. However, the dimension of the object we  
17 need to learn to predict interactions in a network grows quickly with the number of  
18 nodes. Therefore, it becomes computationally and conceptually challenging for large  
19 networks. Here, we present a new predictive procedure combining a graph embedding  
20 method with machine learning techniques to predict interactions on the base of nodes'  
21 metadata. Graph embedding methods project the nodes of a network onto a—low

22 dimensional—latent feature space. The position of the nodes in the latent feature space  
23 can then be used to predict interactions between nodes. Learning a mapping of the  
24 nodes’ metadata to their position in a latent feature space corresponds to a classic—and  
25 low dimensional—machine learning problem. In our current study we used the Random  
26 Dot Product Graph model to estimate the embedding of an observed network, and we  
27 tested different neural networks architectures to predict the position of nodes in the  
28 latent feature space. Flexible machine learning techniques to map the nodes onto their  
29 latent positions allow to account for multivariate and possibly complex nodes’ meta-  
30 data. To illustrate the utility of the proposed procedure, we apply it to a large dataset  
31 of tourist visits to destinations across New Zealand. We found that our procedure  
32 accurately predicts interactions for both existing nodes and nodes newly added to the  
33 network, while being computationally feasible even for very large networks. Overall, our  
34 study highlights that by exploiting the properties of a well understood statistical model  
35 for complex networks and combining it with standard machine learning techniques, we  
36 can simplify the link prediction problem when incorporating multivariate node meta-  
37 data. Our procedure can be immediately applied to different types of networks, and  
38 to a wide variety of data from different systems. As such, both from a network science  
39 and data science perspective, our work offers a flexible and generalisable procedure for  
40 link prediction.

41 *Keywords:* Random Dot Product Graphs, Machine Learning, link prediction, metadata, traits,  
42 predictive models, neural networks, graph embedding

## 43 Introduction

44 Real-world network datasets are often largely incomplete due to non-exhaustive sampling or the  
45 presence of complex hidden processes making data collection difficult [6, 19]. As a result, accounting  
46 for incompleteness within data (e.g. “missing links”) is of key importance both to understand how  
47 different components in a system interact with one another and to accurately predict future trends in  
48 a system [8, 13, 24]. The action of predicting “missing links” or new links in a network is referred as  
49 link prediction in various fields [23, 24]. The most commonly used methods to tackle link prediction  
50 include topological approaches, Block Model-based methods and graph-embedding methods. In  
51 topological methods, certain metrics describing the structure of a network (e.g. network properties  
52 such node degree and various centrality measures) are used to predict interactions [23]. Block  
53 Models-based approaches, such as the probabilistic generative family of Stochastic Block Models  
54 (and variants), aggregate nodes into groups based on their similarity of interactions [15, 45]. Graph  
55 embedding methods on the other hand rely on projecting nodes onto an abstract latent feature  
56 space, so that the interaction probabilities depend on these latent features [2, 5, 43].

57 Multiple studies have shown that incorporating node metadata as covariates can both deepen  
58 our understanding of the network structure [30, 32, 33, 40], and improve link prediction accuracy  
59 in large scale networks [17, 26, 30]. However, incorporating node metadata presents various chal-  
60 lenges. For instance, metadata diversity—i.e. whether the metadata variables are categorical or  
61 continuous—may require different modelling frameworks [3, 26]. Due to the high number of nodes  
62 in large networks, they can be considered as high dimensional objects: indeed, when the network is  
63 represented as a matrix, each node is an additional coordinate. Therefore, accounting for metadata  
64 at the node level may also make the computational requirements overly demanding, as the com-  
65 plexity of the problem scales with the square of the number of nodes. To date, most attempts to  
66 incorporate node metadata for link prediction purposes have focused on node-aggregating methods  
67 such as Stochastic Block Models and its variants [17, 26, 40, 41]. These methods make the prediction  
68 task more amenable by aggregating nodes into homogeneous groups. However, by doing so, they  
69 assume that all nodes within one group behave according to the same interaction probabilities, and  
70 thus are statistically indistinguishable [15, 45]. Unfortunately by disregarding the heterogeneity  
71 of interactions observed at the node level, such approaches oversimplify the network data. Here,  
72 we instead focus on using graph embedding methods which allows us to predict the interaction

73 probabilities of each node directly, rather than aggregating the nodes in groups.

74 In our current study, we propose a new procedure that combines a graph embedding method  
75 with machine learning to predict interactions from nodes' metadata. As the functional relationship  
76 between node metadata and the abstract latent feature spaces of a network is often unknown prior  
77 to data inspection, and can be very complicated, here we suggest using machine learning techniques  
78 to find an accurate mapping. In our procedure, we first use the graph embedding method to project  
79 nodes of the observed network on an abstract latent feature space at a lower dimensional space.  
80 By doing so, it allows us to learn a mapping from the nodes' metadata to their abstract latent  
81 feature space (that we infer from the observed network) in an adequately low dimensional space.  
82 Because we move the problem from the original graph space to a lower dimensional feature space,  
83 our procedure simplifies the task of predicting interaction in large networks. Here, we specifically  
84 used neural networks as our machine learning technique to relate the observed nodes' metadata onto  
85 the latent feature spaces of the observed network. The high flexibility of neural networks allowed us  
86 to account for the diversity of metadata. To illustrate the application of the proposed procedure in  
87 predicting interactions, we used a large dataset of tourist visits to destinations across New Zealand.  
88 Overall, our results showed that the proposed predictive procedure accurately predict interactions  
89 in large networks using both the knowledge from the observed network and the nodes' metadata.  
90 Moreover, the proposed procedure also allowed us to predict interactions for new nodes better than  
91 at random.

## 92 **Materials and methods**

93 In this article we focus on bipartite networks—i.e. networks that feature nodes of two types and  
94 with interactions (or links) that only occur between the different set of nodes. In the following  
95 sections, we describe: 1) the adopted network modelling procedure: first describing the Random  
96 Dot Product Graph model, then explaining how to infer, from an observed network, the position  
97 of its nodes in the latent space, and finally how to relate the nodes' metadata to the nodes in  
98 their latent space using a machine technique; 2) an application to empirical network data; 3) the  
99 sensitivity and performance analyses we conducted to validate the proposed procedure.

## 100 The Random Dot Product Graph model

101 Random Dot Product Graphs (RDPGs) are a class of Latent Position Models [14] developed to  
102 analyse social networks [31, 47], and then extended to many other applications and types of networks  
103 [3, 9, 25, 37, 43]. To describe interactions in a network, such models assume that the probability of  
104 observing an interaction between two nodes is a function of the nodes' features [31, 47]. Here, we  
105 specifically use the RDPG implementation of Young and Scheinerman [47] to predict interactions  
106 in a bipartite context.

107 We define a bipartite network  $G$  as two distinct sets of nodes,  $V$  and  $P$  containing  $M$  and  
108  $N$  nodes respectively, that is where  $V = \{v_1, \dots, v_n\}$  and  $P = \{p_1, \dots, p_m\}$  respectively; and a set  
109 of links,  $E$ , between the sets of nodes—i.e.  $(v_i, p_j) \in E$ . We denote such a bipartite network as  
110  $G(V, P, E)$ . The bipartite network can be further represented as an adjacency matrix, where  $G$  is  
111 represented as the matrix  $A \in \{0, 1\}^{M \times N}$ , where  $A_{ij} = 1$  if  $(v_i, p_j) \in E$  and  $A_{ij} = 0$  otherwise.

112 In a bipartite RDPG model, each node  $v_i$  and  $p_j$  is assigned a vector of latent features  $x_i \in \mathbb{R}^d$   
113 and  $y_j \in \mathbb{R}^d$ . We call  $d$  the dimension of the network's latent feature space, and the vectors  $x_i$   
114 and  $y_j$  indicate the positions of the nodes  $v_i$  and  $p_j$ , respectively, in the network's latent feature  
115 space. The bipartite RDPG model further treats links as independent Bernoulli variables: two  
116 nodes interact with a probability equal to the dot product of their latent vectors, in formula:

$$Pr((v_i, p_j) \in E) = x_i \cdot y_j \quad . \quad (1)$$

117 In matrix notation, we can represent the latent positions of all the nodes in  $V$  and  $P$  as the rows  
118 of a matrix  $\mathbf{V}$  and the columns of a matrix  $\mathbf{P}$ , respectively. As a result, the matrix of probabilities  
119 of interactions between the two node types in the network can be written as the matrix product  
120  $\mathbf{VP}$ .

121 For the matrix product to have meaning, the two matrices  $\mathbf{V}$  and  $\mathbf{P}$  need to have compatible  
122 dimension, which is satisfied if the latent feature spaces for  $V$  and  $P$  are equidimensional (that is,  
123 if the vectors  $x_i$  and  $y_j$  have the same number of coordinates). Moreover, for the matrix prod-  
124 uct to represent probabilities, the products must be in the  $[0, 1]$  range, which imposes additional  
125 geometric constraints in the latent feature spaces. Lastly, it is worth noting that any orthogonal  
126 transformation—e.g. a rotation—of  $\mathbf{V}$  and  $\mathbf{P}$  would result in an equivalent matrix of interaction

127 probabilities: this will limit us to be able to infer the latent feature spaces up to an orthogonal  
128 transformation. Thus, we should refrain from reading any meaning in the absolute position of a  
129 node in the latent feature space.

### 130 **Inferring the position of nodes in the latent feature space**

131 In theory, neither the nodes' positions in the latent feature space, nor the dimension of the latent  
132 feature space are observable. Thus, we need to infer them from the observed network. To do so, we  
133 can exploit the adjacency spectral embedding—which is the truncated Singular Value Decomposition  
134 (SVD) of a network adjacency matrix—to obtain an unbiased estimate of the nodes' positions in  
135 the network's latent feature spaces [37].

136 The full rank SVD of an observed adjacency matrix  $A$  is given by three matrices  $L$ ,  $\Sigma$ , and  $R$   
137 such that  $A = L \times \Sigma \times R^T$ , with  $L$  and  $R$  real orthogonal matrices, and  $\Sigma$  a diagonal matrix whose  
138 entries are the singular values of  $A$  in decreasing order. As the sets of nodes  $V$  and  $P$  contain  $M$   
139 and  $N$  nodes respectively, the matrices  $L$ ,  $\Sigma$ , and  $R$  will have dimensions  $M \times S$ ,  $S \times S$ , and  $N \times S$ ,  
140 respectively, where  $S = \min(M, N)$ . To compute the SVD of a matrix, we used the default `svd`  
141 function in R [35], which performed well for the large visitation data set described in later sections.  
142 (Note that fast algorithms that allow the decomposition of very large matrices such as in Liang  
143 et al. [22] and Zhou and Li [48] also exist if needed). We then used the profile-likelihood elbow  
144 criterion of Zhu and Ghodsi [49] to estimate an adequate dimension  $d \leq S$  for the latent feature  
145 space.

146 Let  $d$  be the chosen dimension for the observed network latent feature space. We denote  $\hat{L}$ ,  $\hat{\Sigma}$ ,  
147 and  $\hat{R}$  as the  $d$ -truncations of  $L$ ,  $\Sigma$ , and  $R$ , respectively. We obtain them by retaining all the rows  
148 and the first  $d$  columns of  $L$  and  $R$ , and the first  $d$  rows and columns of  $\Sigma$ . We then compute the  
149  $d$ -dimensional bipartite adjacency embedding of  $A$  as

$$\begin{aligned} \mathbf{V} &\approx \hat{\mathbf{V}} = \hat{L} \sqrt{\hat{\Sigma}} \\ \mathbf{P} &\approx \hat{\mathbf{P}} = \sqrt{\hat{\Sigma}} \hat{R}^T, \end{aligned} \tag{2}$$

150 where  $\sqrt{\hat{\Sigma}}$  is a  $d \times d$  diagonal matrix defined by the square root of the  $d$  greatest singular values of  
151  $A$ .

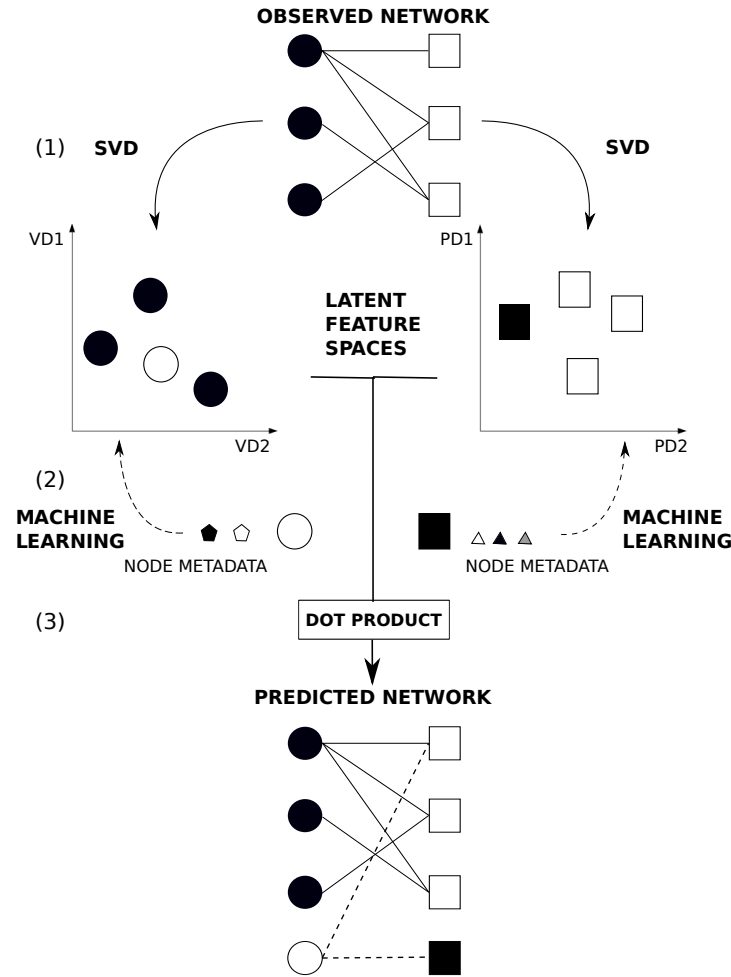

Figure 1: Using a Random Dot Product Graph Framework to predict interactions in a bipartite network. Note that here we use our case study—i.e. the travelling patterns of visitors to touristic destinations—to illustrate the framework. We first consider the travelling patterns of visitors as network data. In (1), the bipartite representation of travelling patterns of visitors: nodes are of two types—circles represent visitors and squares represent places, and links indicate a trip travelled by a given visitor to a given place. Here the solid lines represent the observed links. In (2), we first estimate the position of nodes within the observed bipartite network using a Singular Value Decomposition on the adjacency matrix representing the visitor–place interaction matrix. As a result, we obtain two latent feature spaces: a visitor latent feature space and place latent feature space. Note that here we show the embeddings of nodes of both visitors and places, respectively, in a latent feature space of dimension  $d = 2$ . We then relate the nodes’ metadata directly to their latent feature spaces. To do so, we use machine learning techniques to find the relationship between the two. To further predict *new* interactions in the network using observed metadata of new visitors and new places respectively—the models used to find the relationship of the metadata to the latent feature spaces are used. By doing so, we can project the new visitor and new place into the respective latent trait spaces LD1 and LD2. Finally, in (3), using the dot product, we are able to predict the probability of interaction between the new visitor and the new place added to the visitation network. Here, the dotted lines represent the new predicted links.

## 152 Predicting interactions using the nodes' metadata via the latent feature space

153 Given the positions of all nodes in the latent feature spaces, the RDPG model completely determines  
154 the interaction probabilities between all nodes in the network. This implies that, if we were able to  
155 go from a node's metadata to its position in the network's latent feature space, we would be able  
156 to estimate its interaction probabilities with all other nodes in the network.

157 Let us consider the simplest scenario where we have a one-dimensional latent feature (in other  
158 words, the latent feature space is a vector with one coordinate,  $d = 1$ ) and real valued metadata  
159 for the nodes in  $V$  and  $P$ . We can learn a mapping from the metadata to the latent space by  
160 fitting a linear regression model with the positions of nodes  $v_i$  in the latent feature space,  $x_i \in \mathbb{R}$ ,  
161 as dependent variables and the metadata vectors  $m_i$  as independent predictor variables. Let  $\beta_0$  and  
162  $\beta$  be the estimated intercept and vector of slope parameters for the linear model. The resulting  
163 model allows us to get the position of node  $v_i$  in the predicted latent feature space:  $x^*_i \in \mathbb{R}$ . We  
164 can then estimate the interaction probabilities of  $v_i$  via the dot product of  $x^*_i$  with the positions  
165 of the nodes in  $P$ 's latent feature space. Similarly, we can use the inferred linear model to predict  
166 the latent features of a *new* node added to the network—i.e. a node which was previously not  
167 observed  $v_{n+1}$ —from the node's metadata as followed:  $x_{n+1} = \beta_0 + m_{n+1} \cdot \beta$ . Then, to estimate  
168 the interaction probabilities of  $v_{n+1}$ , we proceed with the dot product of  $x_{n+1}$  with the positions of  
169 the nodes in  $P$ 's latent feature space.

170 The latent feature space of large empirical networks is multivariate (even if not very large,  
171  $1 < d \ll \min(M, N)$ ). In general, nodes' metadata are of different types—i.e. categorical and  
172 continuous. Finally, the relationship between metadata and latent features is often non-linear.  
173 Fortunately, a variety of statistical and machine learning approaches exist to solve the task of  
174 predicting a  $d$ -dimensional real valued vector from another vector (potentially larger and mixed  
175 valued). In particular, neural networks approaches can be used [12, 38]. In our application, we  
176 compare the performance of a classic linear regression, using ordinary least squares, and different  
177 neural network architectures.

178 To conclude, we have seen that we can use: a truncated SVD to estimate the latent feature  
179 spaces of nodes in a bipartite network, a variety of statistical and machine learning approaches to  
180 predict the latent features from the nodes' metadata, and a simple dot product to predict interaction  
181 probabilities from latent features for nodes (Figure 1). In the next section, we apply our procedure



182 to a large network of tourist-place visitation data deploying both linear models and two different  
183 neural network architectures.

## 184 **Predicting tourist destinations from visitors and places metadata**

185 To test the presented procedure, in this section we describe its application to visitation data rep-  
186 resenting the travel destinations of tourists across New Zealand. We specifically show how one can  
187 use visitor and place metadata, respectively, to estimate the interaction probabilities for visitors  
188 to travel to places within the country. We further show how one can potentially use the proposed  
189 procedure to predict *new* interactions—i.e. when new visitors and places are added to the visitation  
190 network—using only the respective nodes’ metadata and knowledge from the existing network.

### 191 **Visitation data**

192 To get an overview of the visitors’ travelling patterns across New Zealand, we extracted data  
193 from two national surveys conducted by the New Zealand Ministry of Business, Innovation and  
194 Employment (MBIE): The International Visitor Survey [28] and the Domestic Travel Survey [27].  
195 The International Visitor Survey (IVS) targeted international visitors departing New Zealand at  
196 the 4 main international airports (Auckland, Wellington, Christchurch and Queenstown) whereas  
197 the Domestic Travel Survey (DTS) contacted domestic travellers via phone interviews about their  
198 recent trips. Both surveys record the list of places to which each visitor travelled during their trip  
199 within New Zealand. This accounted for a total of 189942 visitors travelling to 2616 places across  
200 the country. Note that these numbers refer to *only* visitor and places for which the complete set of  
201 metadata were available (Table 1 Supplementary Information).

### 202 **Node attributes: visitor and place metadata**

203 Visitor metadata includes age, gender, activity type, and the mode of transportation used during  
204 their trip (Table 1). These characteristics are present for both the Domestic Travel Survey and the  
205 International Visitor Survey. As the survey data only had the name of places visited by travellers,  
206 we had to define the attributes of the different places within the visitation data. In general, places  
207 across New Zealand can be categorised based on the ownership of the land or the type of activities  
208 performed on those lands. Therefore, to identify the land type of each place within the visitation

209 data, we used the geospatial maps provided by Land Information New Zealand [20] to map the  
210 places extracted from the different national surveys. For example by doing the latter, this allowed  
211 us to distinguish whether a particular place was categorised as a recreational site or national heritage  
212 site (Table 1).

### 213 **Predicting visitor-place interactions in visitation network using node metadata**

214 Here we are particularly interested to test our predictive procedure in two different contexts: pre-  
215 dicting interaction probabilities of nodes present in the observed network, which we refer as “ob-  
216 served” nodes, and predicting interaction probabilities of nodes that we artificially removed from  
217 the original data set, which we refer as “new” nodes. Artificially removing nodes from the observed  
218 network allows us to further test the ability of the proposed predictive procedure to predict inter-  
219 action probabilities of out-of-sample nodes—i.e. when either new visitors or places are added to the  
220 network—using their metadata. As such, we split the visitation data into a training and a validation  
221 set. The training set contains the *observed* nodes and validation set contains the *new* nodes. As the  
222 validation data serves as the *new* data, we made sure that the validation set contained both visitors  
223 and places identities not present in the training data set. Note that we build the observed visitation  
224 network from the interaction data contained in the training set and computed its adjacency matrix.

225 In the rest of this section, we explain our predictive procedure in detail. The procedure involves  
226 three key steps: (1) we perform a Singular Value Decomposition of the adjacency matrix of the  
227 observed network to compute the position of the observed nodes (from the training data) in their  
228 latent feature space; (2) we use the training data to first fit regression models that predict the  
229 nodes’ positions in the latent feature space as a function of the nodes’ metadata; then, we use the  
230 fitted models to predict the position of the nodes from the validation data in their latent feature  
231 space; (3) we use these predicted positions to estimate the interaction probabilities of nodes in the  
232 validation set.

233 (1) We computed the Singular Value Decomposition (SVD) of the training network’s adjacency  
234 matrix  $A_T$ . Then, truncating the SVD, we computed the positions of the observed visitor and place  
235 nodes in their respective latent feature spaces,  $\hat{\mathbf{V}}_T$  and  $\hat{\mathbf{P}}_T$  respectively:

$$A_T \approx \hat{L} \sqrt{\hat{\Sigma}} \times \sqrt{\hat{\Sigma}} \hat{R}^T := \hat{\mathbf{V}}_T \hat{\mathbf{P}}_T \quad (3)$$

236 (2) We fit three different types of multivariate regression models on the training data set. Let  
237  $\mathbf{v}_T$  and  $\mathbf{p}_T$  be the metadata for visitor and places nodes in the training set, then the regression  
238 modelling task is to find a pair of function  $\bar{f}$  and  $\bar{g}$  such that  $\bar{f}(\mathbf{v}_T)$  and  $\bar{g}(\mathbf{p}_T)$  best approximate  
239  $\hat{\mathbf{V}}_T$  and  $\hat{\mathbf{P}}_T$  respectively, where  $\bar{f}$  and  $\bar{g}$  are part of some family of functions  $\bar{f} \in \{f\}$  and  $\bar{g} \in \{g\}$ .  
240 For sake of clarity,  $\bar{f}$  and  $\bar{g}$  are function from the space of metadata (visitor nodes' and place nodes'  
241 metadata respectively) to the space of latent features (for visitors and places respectively).

242 Namely, we fit: a) a linear regression—where we used a linear function to relate directly the  
243 metadata to the latent feature space (specified as in Table S3); b) a multilayer perceptron (MLP)—  
244 i.e. a neural network with one dense hidden layer of 200 nodes using a rectified linear unit (ReLU) as  
245 our activation function; and c) a neural network with two dense hidden layers (NN) of 250 nodes each  
246 and the ReLU activation function. Due to the variety of data types—i.e. varying from categorical  
247 to continuous variables (Table S2)—and the high flexibility of neural networks in solving regression  
248 and classification problems [16], we compared two learning rates: a constant learning rate of 0.01  
249 and a time-based decay—where the initial learning rate (0.01) decreased by 0.0001 after each epoch.  
250 We used the Mean Absolute Error to measure the distance between the predicted and estimated  
251 latent features and assess the accuracy of the model training (refer to Table S4 to see the results  
252 obtained using other metrics). To monitor the training of the different models and ensure that  
253 they were not overfitting, we split the training data set into two sets: a training set (70 % of the  
254 training set) and a test set (30 % of the training set). We trained all the regression models on the  
255 training set and evaluated their accuracy on the test set. We used Google's deep learning software  
256 TensorFlow [1] and Keras [7] implemented in Python 2.7 [44] to fit all the aforementioned models  
257 using the adaptive moment estimation (Adam) optimiser [18] with 30 epochs and a batch size of 20.  
258 We then used the fitted multivariate regression models to predict the positions of the nodes from  
259 the validation data set in the latent feature space,  $\bar{\mathbf{V}}_V$  and  $\bar{\mathbf{P}}_V$  respectively. The predicted values  
260  $\bar{\mathbf{V}}_V$  and  $\bar{\mathbf{P}}_V$  are functions of the nodes' metadata:

$$\begin{aligned}\bar{\mathbf{V}}_V &:= \bar{f}(\mathbf{v}_V) \\ \bar{\mathbf{P}}_V &:= \bar{g}(\mathbf{p}_V),\end{aligned}\tag{4}$$

261 where  $\mathbf{v}_V$  and  $\mathbf{p}_V$  are the metadata for visitor and places nodes in the validation set, and  $\bar{f}$  and  $\bar{g}$   
262 are the function obtained from the training data.

263 (3) Using the nodes' positions  $\bar{\mathbf{V}}_V$  and  $\bar{\mathbf{P}}_V$  obtained by the models in (2), we estimated the  
264 interaction probabilities for all nodes present in the validation data and the nodes in the training  
265 data set by multiplying the matrices containing the nodes' position in their respective latent feature  
266 spaces:

$$\begin{aligned} Pr((v_V, p_T) \in E) &:= \bar{\mathbf{V}}_V \hat{\mathbf{P}}_T \\ Pr((v_T, p_V) \in E) &:= \bar{\mathbf{V}}_T \hat{\mathbf{P}}_V \end{aligned} \quad (5)$$

267 where, with some abuse of notation,  $Pr((v_V, p_T) \in E)$  and  $Pr((v_T, p_V) \in E)$  are the matrices of  
268 interaction probabilities between visitor nodes in the validation set and places nodes in the training  
269 set, and between visitor nodes in the training set and places nodes in the validation set.

270 Specific pairwise interaction probabilities can be estimated multiplying the vector of the pre-  
271 dicted latent feature position of new nodes (inferred from the regression methods) to the latent  
272 features position vectors (estimated from the SVD) for all observed nodes present in the observed  
273 network, that is, using the dot product. For example, considering a new visitor node  $n$  with meta-  
274 data  $\mathbf{v}_n$ , a predictive function  $\bar{f}$ , and a known place node  $p$ , whose position in the latent feature  
275 space (as obtained by SVD in step 1) is  $x_p$ , the interaction probability between  $n$  and  $p$  is:

$$Pr((n, p) \in E) := \bar{f}(\mathbf{v}_n) \cdot x_p. \quad (6)$$

## 276 Sensitivity and performance analysis of predictive procedure

277 We calculated the probability of interaction between the nodes in the test set as:

$$Pr((v_{test}, p_{test}) \in E) := \bar{\mathbf{V}}_{test} \bar{\mathbf{P}}_{test} = \bar{f}(\mathbf{v}_{test}) \bar{g}(\mathbf{p}_{test}) \quad (7)$$

278 where  $v_{test}$  and  $p_{test}$  are the nodes in the test set,  $\bar{\mathbf{V}}_{test}$  and  $\bar{\mathbf{P}}_{test}$  are the predicted latent features  
279 positions,  $\mathbf{v}_{test}$  and  $\mathbf{p}_{test}$  are the nodes metadata, and  $\bar{f}$  and  $\bar{g}$  are the trained predictive functions.

280 To assess the performance of the overall predictive procedure, we calculated the sensitivity—i.e.  
281 the ratio of correctly predicted links to observed links, and the accuracy—i.e. the ratio of correctly  
282 predicted observed links (True Positive) and correctly absent links (True Negative)—in our test  
283 data [42].

284 Furthermore, to evaluate and assess the performance of the different combinations of RDPG-  
285 regression models in correctly predicting the observed interactions, we used the Area Under Curve-  
286 Receiver Operator Curve (AUC-ROC) to evaluate the performance of the different combinations.  
287 To do so, we calculated the rate of True Positives—i.e. predicting an interaction when it is actually  
288 present—and False Positives—i.e. predicting an interaction when it is actually absent—at different  
289 thresholds varying from 0 to 1. AUC-ROC is used as a measure to assess the ability of different  
290 models to distinguish between a True Positive and a False Positive. For instance when  $0.5 < AUC \leq$   
291 1, this indicates that the predictive model is performing well—i.e. the model effectively distinguishes  
292 a True Positive from a False Positive—whereas  $0 \leq AUC < 0.5$  indicates that the predictive model  
293 is not effectively distinguishing between True Positives and False Positives.

## 294 Results

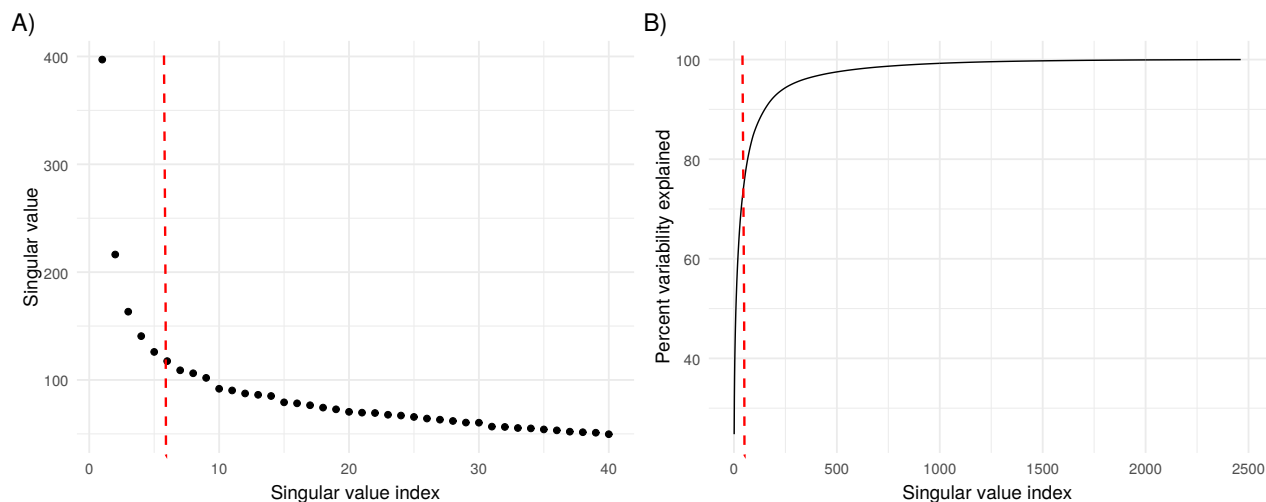

Figure 2: Identifying an adequate dimension  $d$  of network data. A) The scree plot represents the singular values of the adjacency matrix of the visitation network in decreasing order of  $d$ . The x-axis shows the singular value index, and the y-axis indicates the singular values. B) Cumulative plot showing the percentage variability explained with the increasing singular value indexes. The x-axis again shows the singular value index and the y-axis indicates the percent of variance explained. Using Zhu and Ghodsi [49]’s likelihood criteria, we picked  $d = 6$  as indicated by the red dotted line. This dimension explains 70 % of the variability of the visitation network data.

295 For the training visitation dataset (number of visitors = 136910, number of links = 636497), the  
296 Zhu and Ghodsi [49]’s profile-likelihood criterion indicated a six dimensional latent feature space  
297 ( $d = 6$ ) as adequate. This accounted for approximately to 70 % variability of the visitation network  
298 data (Figure 2).

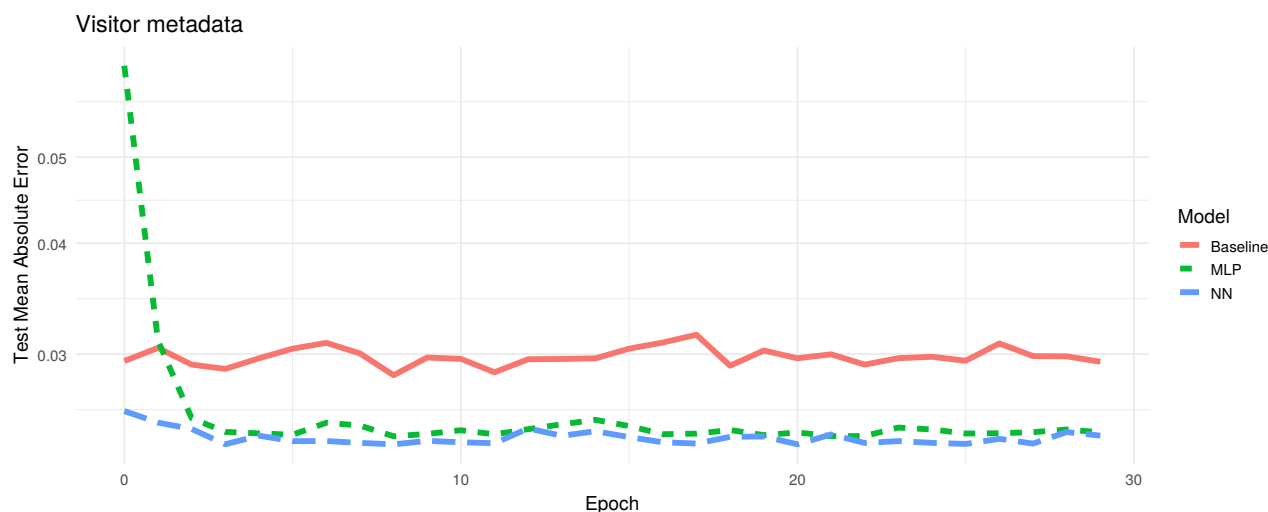

Figure 3: Training of regression models over time when projecting observed visitor metadata onto the latent feature space using an adaptive moment estimation (Adam) optimiser run with 30 epochs and a batch size of 20. The plot shows the model validation—i.e. the subset of training visitation dataset used—to validate the three different models in finding the best mapping from the node metadata to the latent feature space. The x-axis indicates the epochs. The y-axis indicates the Mean Absolute Error (MAE), which is the cost function used to measure the accuracy of model predictions—i.e. it measures the distance between the estimated latent feature space (SVD) and the predicted latent feature space. The red line shows the learning rate of the linear regression model (Baseline), the green line indicates the learning rate of the multilayer perceptron model (MLP), and the blue line indicates the neural network with two hidden layers (NN). The plot shows that both the MLP model and NN model performed better than the Baseline model.

299 Overall we found that the neural networks performed better than the linear regression model in  
300 finding the best mapping from the node metadata to the latent feature spaces. More specifically,  
301 for the visitor metadata, we found that the neural network with two hidden layers (Mean Squared  
302 Error (MSE) = 0.0009) and multilayer perceptron performed (MSE = 0.0010) better compared to  
303 the linear regression model (MSE = 0.0014) using a constant learning rate (Figure 3). We found  
304 similar patterns for the Time-based learning rate (Figure S1).

305 For the place metadata, we found that the the multilayer perceptron model (MSE = 0.125)  
306 and linear regression model (MSE = 0.141) performed better than the neural network with two  
307 hidden layers (MSE = 0.143) (Figure 4). We also observed similar patterns for models run with the  
308 Time-based learning rate (Supplementary Information).

309 The predictive procedure we proposed performed significantly better than at random (Table S5).  
310 Comparing the different latent feature prediction models, we found that the dot product of the  
311 visitor linear regression model and the place MLP (model 2: neural network with one hidden layer)  
312 performed better with  $AUC = 0.736$ , followed by dot product of the visitor MLP and the place  
313 MLP model with  $AUC = 0.701$  (Table 3).

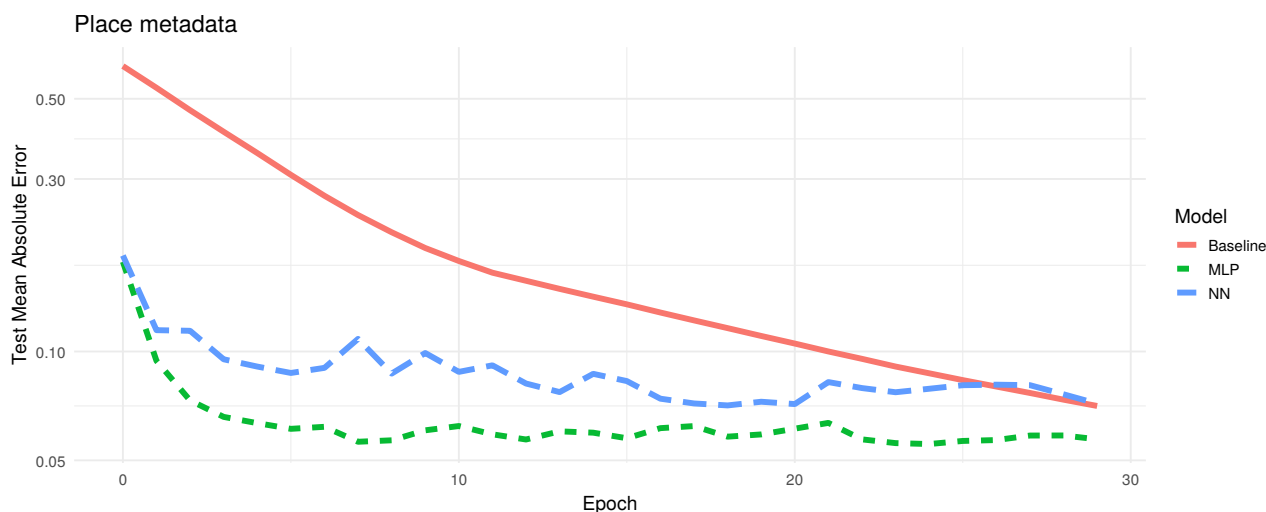

Figure 4: Training of regression models over time when projecting observed place metadata onto the latent feature space using an adaptive moment estimation (Adam) optimiser run with 30 epochs and a batch size of 20. The plot shows the model validation—i.e. the subset of training visitation dataset used—to validate the three different models in finding the best mapping from the node metadata to the latent feature space. The x-axis indicates the epochs. The y-axis indicates the Mean Absolute Error (MAE), which is the cost function used to measure the accuracy of model predictions—i.e. it measures the distance between the estimated latent feature space (SVD) and the predicted latent feature space. The red line shows the learning rate of linear regression model (Baseline), the green line indicates the learning rate of the multilayer perceptron model (MLP), and the blue line indicates the neural network with two hidden layers (NN). Here the MLP model seems to perform better than the baseline and NN models.

## Discussion

314

315 In the current study, we present a new predictive procedure which allows us to use both the nodes'  
316 metadata and the knowledge gained from the observed network to predict interactions in large  
317 scale networks. More specifically, we showed how to extend the RDPG model—which is a graph  
318 embedding method—with a combination of statistical and machine learning techniques. Doing so  
319 allowed us to directly relate the nodes' metadata to their corresponding latent feature spaces. To  
320 further illustrate the application of the presented procedure on real world data, we used a large  
321 data set of tourist travelling patterns within New Zealand. Overall, we showed that the predictive  
322 procedure works in a real-world context with an accuracy of  $AUC = 0.736$ , which indicates that the  
323 procedure performed better than at random. Moreover, we showed that our procedure also allowed  
324 us to predict interactions for new nodes added to the network.

325

326 To our knowledge, few studies have focused on exploiting the nodes' metadata to predict in-  
327 teractions using graph-embedding methods. Most research including node metadata to predict  
328 interactions have used node-aggregating methods [26, 40, 41]. However, such approaches assume  
that all nodes belonging to a given group behave identically, ignoring that certain nodes within the

329 given group might be interacting with other nodes in the network to different extents. We instead  
330 propose using a predictive procedure based on the RDPG model combined with a machine learning  
331 algorithm to account for the heterogeneity of interactions observed at the node level. Moreover,  
332 using the truncated SVD allows us to represent an observed network at a lower dimension, which  
333 simplified the task of directly relating the observed nodes' metadata to the estimated latent feature  
334 spaces (obtained from the truncated SVD). Using the inferred relationship of nodes' metadata and  
335 the estimated latent feature spaces from the neural networks, we can predict the position of both  
336 observed and new nodes in a predicted latent feature space using only the nodes' metadata and  
337 knowledge from the observed network. Then, using the statistical properties of the RDPG model,  
338 we can proceed to predict interactions at the node level in a network by simply calculating the dot  
339 product of the given node to the other nodes present in the network [4, 25, 37].

340 Machine learning techniques such as neural networks are increasingly popular tools in various  
341 applications due to their high predictive accuracy [29, 46]. Here, we used neural networks to relate  
342 the nodes' metadata to their latent feature spaces obtained from a truncated SVD. Various studies  
343 suggest that deeper neural networks—i.e. neural networks with a high number of hidden layers—tend  
344 to outperform shallow neural network in a wide variety of tasks [12, 16]. While both of the neural  
345 network architectures we tested outperformed the linear regression model in mapping the nodes'  
346 metadata onto the latent feature spaces, our results showed that the linear regression model (for  
347 the visitors' metadata) and the neural network with one hidden layer (for the places' metadata)  
348 outperformed the the neural network with two hidden layers in predicting links. This therefore  
349 suggests that simpler models can outperform deeper neural networks in at least some situations.  
350 Note, however, that the main purpose of our study was not to find the absolute best neural network  
351 architecture, and hence we do not expect further studies to necessarily confirm this result.

352 Metadata are known to be good proxies from which to predict interactions in a network [17,  
353 30, 32, 33, 41]. However, node metadata can be of varied type—i.e. categorical and continuous  
354 variables, and these variables might not have linear relationships to the latent feature space; these  
355 factors together necessitate different modelling frameworks [3, 26]. Here, we showed that the high  
356 flexibility of neural networks (or other machine learning algorithms) enabled the identification of  
357 an accurate mapping from the visitors' metadata onto the visitors' latent feature space and from  
358 the places' metadata to the places' latent feature space, respectively. As the functional relationship



359 between nodes' metadata and their position in the latent feature space can be very complicated,  
360 neural network methods are a promising approach to learn it.

361 While each step of the presented procedure is robust, there might be many sources of error.  
362 In the current study, we only present an exploratory analysis of a bipartite network to predict  
363 interactions in a visitation network using both node types' metadata. Rather than attempting to  
364 find the optimal dimension of our network data, we instead chose  $d$  according to the Zhu and Ghodsi  
365 [49]'s profile-likelihood criterion. We selected  $d$  *a priori*, based only on the topological structure of  
366 the network. It could be interesting to further explore whether using a different procedure to select  
367 the dimension of the latent space improves the accuracy of link prediction. Indeed, *a posteriori*  
368 selection (trying to identify which dimension  $d$  grants a higher prediction accuracy) is another  
369 possibility, but may require substantially greater computational effort.

370 The way in which we split our training and test set implies that the observed and new nodes'  
371 metadata are sampled from the same distribution. Therefore, the models learn a relevant mapping  
372 of the new nodes into a suitable region of the latent feature space. However, if this is not the case,  
373 and the metadata of the new nodes is completely different from the one of the observed nodes,  
374 nothing guarantees a good placement in the latent feature space. How to deal with new nodes with  
375 "surprising" metadata is an open problem.

376 In addition, we assumed all the nodes' metadata could be informative when predicting inter-  
377 actions. As a result, we learnt a mapping from the nodes' full metadata to their respective latent  
378 feature spaces obtained from the truncated SVD. However, we know that not all of the metadata  
379 is necessarily informative, specially when predicting interactions [11, 32]. Therefore, further inves-  
380 tigating the relationship between the nodes' metadata and the latent feature space obtained from  
381 the truncated SVD should be done to understand whether certain node metadata are affecting the  
382 link prediction accuracy in the presented procedure.

383 Moving forward, it would be interesting to extend the current procedure to account for missing  
384 data in: 1) the interaction probability matrix—i.e. distinguishing new and absent interactions—and  
385 2) the metadata—i.e. when some of the nodes' metadata are missing. One can imagine a scenario  
386 where a survey was carried out, and a person did not complete the full survey. If we were to have the  
387 metadata of that particular person, we could potentially interpolate some of their answers. Similarly,  
388 in the case where data is extracted from an experimental set up, data might be missing as a result of

389 failed experiments. Accounting for such missing information can be particularly important. In this  
390 direction, deeper or dedicated neural network architectures, such as the ones in Smieja et al. [39]  
391 and Przewiżeklikowski et al. [34], could be used. More recently, Lérique et al. [21] have used a neural  
392 network approach to find the joint embedding of metadata and the network structure to predict the  
393 interaction probabilities. However, one the main limitations of the latter approach is the need to  
394 find an optimal dimension for the both the nodes' metadata and the network data. Using a machine  
395 learning approach to learn a mapping of nodes' metadata directly to their interaction probabilities  
396 in large networks remains a hard problem when performed in a very high dimensional space. Here  
397 we showed that we can simplify that problem by exploiting the properties of a well understood  
398 statistical model for complex networks, the Random Dot Product Graph model, and combining it  
399 with standard machine learning techniques. The RDPG model grants us a robust estimation of  
400 a low dimensional network embedding (the nodes' latent feature spaces) and a convenient way to  
401 estimate its dimension. As in other examples [36], promising results are obtained not by abandoning  
402 a model-based approach to science but by merging it with machine learning techniques.

## 403 **Data Accessibility**

404 All visitation data from the Ministry of Business Innovation & Employment (MBIE) used in this  
405 study are publicly available on <https://www.mbie.govt.nz/>.

## 406 **Authors' contributions**

407 RR and GVDR designed the study. RR contributed to the code, carried out the analysis and wrote  
408 the first draft of the manuscript. All authors contributed to framing the manuscript, editing and  
409 approving the final draft.

## 410 **Acknowledgements**

411 RR and DBS acknowledge funding from the New Zealand's Biological Heritage Ngā Koiora Tuku  
412 Iho National Science Challenge. The authors would also like to thank Michelle Marraffini, Hao Ran  
413 Lai, Stephen Merry, and current members of the Stouffer Lab and DaRe group for feedback and

414 valuable discussions.

## 415 References

- 416 [1] Abadi, M., Agarwal, A., Barham, P., Brevdo, E., Chen, Z., Citro, C., Corrado, G. S., Davis, A.,  
417 Dean, J., Devin, M., et al. (2016). Tensorflow: Large-scale machine learning on heterogeneous  
418 distributed systems. *arXiv preprint arXiv:1603.04467*.
- 419 [2] Athreya, A., Fishkind, D. E., Tang, M., Priebe, C. E., Park, Y., Vogelstein, J. T., Levin, K.,  
420 Lyzinski, V., and Qin, Y. (2017). Statistical inference on random dot product graphs: a survey.  
421 *The Journal of Machine Learning Research*, 18(1):8393–8484.
- 422 [3] Athreya, A., Tang, M., Park, Y., Priebe, C. E., et al. (2021). On estimation and inference in  
423 latent structure random graphs. *Statistical Science*, 36(1):68–88.
- 424 [4] Binkiewicz, N., Vogelstein, J. T., and Rohe, K. (2017). Covariate-assisted spectral clustering.  
425 *Biometrika*, 104(2):361–377.
- 426 [5] Cai, H., Zheng, V. W., and Chang, K. C.-C. (2018). A comprehensive survey of graph embedding:  
427 Problems, techniques, and applications. *IEEE Transactions on Knowledge and Data Engineering*,  
428 30(9):1616–1637.
- 429 [6] Chen, X., Chen, Y., and Xiao, P. (2013). The impact of sampling and network topology on the  
430 estimation of social intercorrelations. *Journal of Marketing Research*, 50(1):95–110.
- 431 [7] Chollet, F. et al. (2015). Keras. <https://keras.io>.
- 432 [8] Clauset, A., Moore, C., and Newman, M. E. (2008). Hierarchical structure and the prediction  
433 of missing links in networks. *Nature*, 453(7191):98.
- 434 [9] Dalla Riva, G. V. and Stouffer, D. B. (2016). Exploring the evolutionary signature of food webs’  
435 backbones using functional traits. *Oikos*, 125(4):446–456.
- 436 [10] Department Of Conservation (2016). Survey of New Zealanders 2013–2016. Available at  
437 <https://www.doc.govt.nz/>. (Accessed on 2016/11/01).

- 438 [11] Fajardo-Fontiveros, O., Sales-Pardo, M., and Guimera, R. (2021). Node metadata can produce  
439 predictability transitions in network inference problems. *arXiv preprint arXiv:2103.14424*.
- 440 [12] Goodfellow, I., Bengio, Y., Courville, A., and Bengio, Y. (2016). *Deep learning*, volume 1.  
441 MIT Press Cambridge.
- 442 [13] Guimerà, R. and Sales-Pardo, M. (2009). Missing and spurious interactions and the reconstruc-  
443 tion of complex networks. *Proceedings of the National Academy of Sciences*, 106(52):22073–22078.
- 444 [14] Hoff, P. D., Raftery, A. E., and Handcock, M. S. (2002). Latent space approaches to social  
445 network analysis. *Journal of the American Statistical Association*, 97(460):1090–1098.
- 446 [15] Holland, P. W., Laskey, K. B., and Leinhardt, S. (1983). Stochastic blockmodels: First steps.  
447 *Social Networks*, 5(2):109–137.
- 448 [16] Hornik, K. (1991). Approximation capabilities of multilayer feedforward networks. *Neural*  
449 *Networks*, 4(2):251–257.
- 450 [17] Hric, D., Peixoto, T. P., and Fortunato, S. (2016). Network structure, metadata, and the  
451 prediction of missing nodes and annotations. *Physical Review X*, 6(3):031038.
- 452 [18] Kingma, D. P. and Ba, J. (2014). Adam: a method for stochastic optimization (2014). *arXiv*  
453 *preprint arXiv:1412.6980*, 180.
- 454 [19] Kossinets, G. (2006). Effects of missing data in social networks. *Social Networks*, 28(3):247–268.
- 455 [20] Land Information New Zealand (2017). New Zealand Gazetteer of place names. Available at  
456 <https://www.linz.govt.nz/>. (Accessed on 2017/01/15).
- 457 [21] Leriche, S., Abitbol, J. L., and Karsai, M. (2020). Joint embedding of structure and features  
458 via graph convolutional networks. *Applied Network Science*, 5(1):1–24.
- 459 [22] Liang, F., Shi, R., and Mo, Q. (2016). A split-and-merge approach for singular value decom-  
460 position of large-scale matrices. *Statistics and Its Interface*, 9(4):453.
- 461 [23] Liben-Nowell, D. and Kleinberg, J. (2007). The link-prediction problem for social networks.  
462 *Journal of the American Society for Information Science and Technology*, 58(7):1019–1031.

- 463 [24] Lü, L. and Zhou, T. (2011). Link prediction in complex networks: A survey. *Physica A:*  
464 *Statistical Mechanics and its Applications*, 390(6):1150–1170.
- 465 [25] Marchette, D. J. and Priebe, C. E. (2008). Predicting unobserved links in incompletely observed  
466 networks. *Computational Statistics & Data Analysis*, 52(3):1373–1386.
- 467 [26] Mele, A., Hao, L., Cape, J., and Priebe, C. E. (2019). Spectral inference for large stochastic  
468 blockmodels with nodal covariates. *arXiv preprint arXiv:1908.06438*.
- 469 [27] Ministry of Business Innovation and Employment (2016a). Domestic Travel Survey. Available  
470 at <https://www.mbie.govt.nz/>. (Accessed on 2016/11/01).
- 471 [28] Ministry of Business Innovation and Employment (2016b). International Visitor Survey. Avail-  
472 able at <https://www.mbie.govt.nz/>. (Accessed on 2016/11/01).
- 473 [29] Montavon, G., Samek, W., and Müller, K.-R. (2018). Methods for interpreting and under-  
474 standing deep neural networks. *Digital Signal Processing*, 73:1–15.
- 475 [30] Newman, M. E. and Clauset, A. (2016). Structure and inference in annotated networks. *Nature*  
476 *Communications*, 7(1):1–11.
- 477 [31] Nickel, C. L. M. (2008). *Random dot product graphs a model for social networks*. PhD thesis,  
478 Johns Hopkins University.
- 479 [32] Peel, L., Larremore, D. B., and Clauset, A. (2017). The ground truth about metadata and  
480 community detection in networks. *Science Advances*, 3(5):e1602548.
- 481 [33] Peixoto, T. P. (2014). Hierarchical block structures and high-resolution model selection in large  
482 networks. *Physical Review X*, 4(1):011047.
- 483 [34] Przewiżeklikowski, M., Śmieja, M., and Struski, L. (2020). Estimating conditional density  
484 of missing values using deep gaussian mixture model. In *International Conference on Neural*  
485 *Information Processing*, pages 220–231. Springer.
- 486 [35] R Core Team (2019). R: A Language and Environment for Statistical Computing. R Foundation  
487 for Statistical Computing, Vienna, Austria. Available online <https://www.R-project.org/>.

- 488 [36] Rackauckas, C., Ma, Y., Martensen, J., Warner, C., Zubov, K., Supekar, R., Skinner, D.,  
489 Ramadhan, A., and Edelman, A. (2020). Universal differential equations for scientific machine  
490 learning. *arXiv preprint arXiv:2001.04385*.
- 491 [37] Rubin-Delanchy, P., Cape, J., Tang, M., and Priebe, C. E. (2017). A statistical interpretation of  
492 spectral embedding: the generalised random dot product graph. *arXiv preprint arXiv:1709.05506*.
- 493 [38] Sarle, W. S. (1994). Neural networks and statistical models.
- 494 [39] Smieja, M., Struski, L., Tabor, J., Zieliński, B., and Spurek, P. (2018). Processing of missing  
495 data by neural networks. *arXiv preprint arXiv:1805.07405*.
- 496 [40] Sweet, T. M. (2015). Incorporating covariates into stochastic blockmodels. *Journal of Educa-*  
497 *tional and Behavioral Statistics*, 40(6):635–664.
- 498 [41] Sweet, T. M. and Zheng, Q. (2018). Estimating the effects of network covariates on subgroup  
499 insularity with a hierarchical mixed membership stochastic blockmodel. *Social Networks*, 52:100–  
500 114.
- 501 [42] Swets, J. A. (1988). Measuring the accuracy of diagnostic systems. *Science*, 240(4857):1285–  
502 1293.
- 503 [43] Tang, R., Ketcha, M., Badea, A., Calabrese, E. D., Margulies, D. S., Vogelstein, J. T., Priebe,  
504 C. E., and Sussman, D. L. (2018). Connectome smoothing via low-rank approximations. *IEEE*  
505 *Transactions on Medical Imaging*, 38(6):1446–1456.
- 506 [44] van Rossum, G. (1995). Python tutorial. Technical Report CS-R9526, Centrum voor Wiskunde  
507 en Informatica (CWI), Amsterdam.
- 508 [45] Wang, Y. J. and Wong, G. Y. (1987). Stochastic blockmodels for directed graphs. *Journal of*  
509 *the American Statistical Association*, 82(397):8–19.
- 510 [46] Xing, E. P., Ho, Q., Xie, P., and Wei, D. (2016). Strategies and principles of distributed  
511 machine learning on big data. *Engineering*, 2(2):179–195.

- 512 [47] Young, S. J. and Scheinerman, E. R. (2007). Random dot product graph models for social  
513 networks. In *International Workshop on Algorithms and Models for the Web-Graph*, pages 138–  
514 149. Springer.
- 515 [48] Zhou, L. and Li, C. (2016). Outsourcing eigen-decomposition and singular value decomposition  
516 of large matrix to a public cloud. *IEEE Access*, 4:869–879.
- 517 [49] Zhu, M. and Ghodsi, A. (2006). Automatic dimensionality selection from the scree plot via the  
518 use of profile likelihood. *Computational Statistics & Data Analysis*, 51(2):918–930.

Table 1: Summary of node metadata used

| Node type | Metadata               | Data type   | Classes                                                                                                                                                                                                               |
|-----------|------------------------|-------------|-----------------------------------------------------------------------------------------------------------------------------------------------------------------------------------------------------------------------|
| Visitor   | Gender                 | Categorical | Male, Female                                                                                                                                                                                                          |
| Visitor   | Age                    | Categorical | Age group: < 20, 21–25, 26–34, 35–39, 40–44, 45–49, 50–51, 64–69, > 70                                                                                                                                                |
| Visitor   | Activity type          | Categorical | Hiking, Site-seeing, Water activities, Museums and other heritage sites, Visiting family, Work purposes                                                                                                               |
| Visitor   | Mode of transportation | Categorical | Car, Van, Boat, Tour bus, Bus, Helicopter, Aeroplane                                                                                                                                                                  |
| Place     | Place geolocation      | Continuous  | Latitude and Longitude of locations                                                                                                                                                                                   |
| Place     | Place type             | Categorical | Heritage site, Crown Protected area, Town, Village, Recreational site                                                                                                                                                 |
| Place     | Regional Council       | Categorical | Northland, Auckland, Waikato, Bay of Plenty, Gisborne, Hawke’s Bay, Taranaki, Manawatu-Wanganui, Wellington, Tasman/Nelson, Marlborough, West Coast, Canterbury, Otago, Southland, and Areas Outside Regional Council |

Table 2: Summary of number of visitors and places used for the different steps of the predictive procedure

| Dataset            | Analysis                    | No. of visitors           | No. of places         |
|--------------------|-----------------------------|---------------------------|-----------------------|
| Full training set  | SVD                         | 101656                    | 430                   |
| Model training set | Neural Network              | 71159                     | 301                   |
| Model test set     | Neural Network              | 30497                     | 129                   |
| Validation set     | Neural Network, Dot Product | 88286 (43662 <i>new</i> ) | 360 (120 <i>new</i> ) |



Table 3: Accuracy of model predictions obtained from RDPG-regression procedure. The table indicates the Area Under Curve (AUC) values for each model calculated using Mean Absolute Error as the cost function to measure the distance between the estimated latent feature spaces and the predicted latent feature space.

|         |          | Place    |              |       |
|---------|----------|----------|--------------|-------|
|         |          | Baseline | MLP          | NN    |
| Visitor | Baseline | 0.630    | <b>0.736</b> | 0.699 |
|         | MLP      | 0.645    | 0.701        | 0.665 |
|         | NN       | 0.653    | 0.699        | 0.670 |

## 519 **Supplementary Information**

### 520 **Visitation data**

Table S1: Summary of visitation data extracted from national surveys

| Organisation | Survey | Years       | Places | Visitors | Visitor-Place interactions |
|--------------|--------|-------------|--------|----------|----------------------------|
| MBIE         | IVS    | 1997 - 2016 | 548    | 110 750  | 89 309 500                 |
| MBIE         | DTS    | 1997 - 2008 | 2 426  | 84 891   | 473 070 000                |

521 To get an overview of the visitors' travelling patterns across New Zealand, we extracted data  
522 from three national surveys conducted by the New Zealand Ministry of Business, Innovation and  
523 Employment (MBIE) and Department of Conservation (DOC): The International Visitor Survey  
524 [28], the Domestic Travel Survey [27] and the National Survey of New Zealanders [10] (Table 1).  
525 The International Visitor Survey (IVS) targets international visitors departing New Zealand at the  
526 4 main international airports (Auckland, Wellington, Christchurch and Queenstown) whereas the  
527 Domestic Travel Survey (DTS) contacts the domestic travellers via phone interviews about their  
528 recent trips. Both surveys record detailed information about the trips travelled by each visitor.

529 Note that as in the current study we focused on testing our predictive framework, we selected  
530 *only* visitors and places with the complete set of information. We therefore resulted with 189942  
531 visitors (out of 195641) and 2616 places (out of 2974).

Table S2: Summary of node metadata used for neural networks

| Node type | Metadata               | Data type   | Output type                           |
|-----------|------------------------|-------------|---------------------------------------|
| Visitor   | Age                    | Categorical | Single label with multiple classes    |
| Visitor   | Gender                 | Categorical | Binary                                |
| Visitor   | Activity type          | Categorical | Multiple labels with multiple classes |
| Visitor   | Mode of transportation | Categorical | Single label with multiple classes    |
| Place     | Place geolocation      | Continuous  | Numerical values                      |
| Place     | Place type             | Categorical | Multiple labels with multiple classes |
| Place     | Regional Council       | Categorical | Single label with multiple classes    |

## 532 Mapping node metadata to latent feature spaces

Table S3: Regression models used to predict position of nodes using observed metadata

| Metadata | Model                                                                                                   |
|----------|---------------------------------------------------------------------------------------------------------|
| Visitor  | $x_n = \beta_0 + \beta_{Age}x_1 + \beta_{Gender}x_2 + \beta_{Activities}x_3 + \beta_{Transport}x_4$     |
| Place    | $y_m = \beta_0 + \beta_{Region}y_1 + \beta_{Placetype}y_2 + \beta_{Latitude}y_3 + \beta_{Longitude}y_4$ |

i) Cost function: Mean Squared Error (MSE)

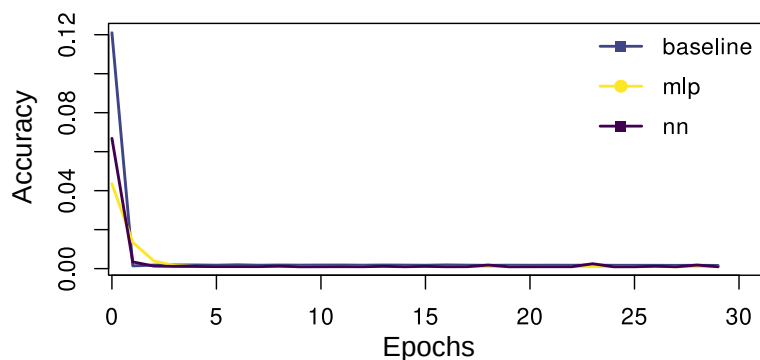

ii) Cost function: Mean Absolute Error (MAE)

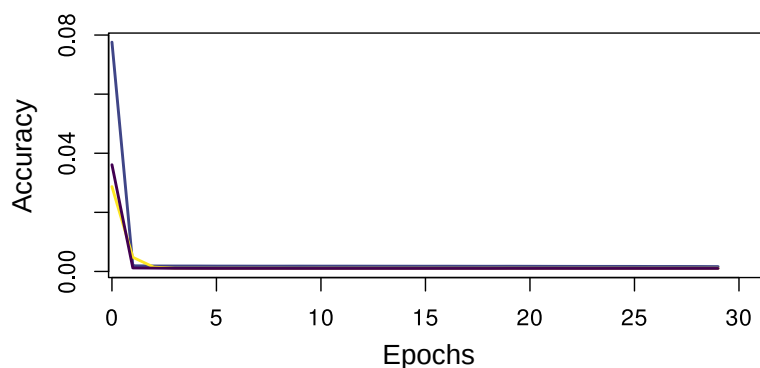

iii) Cost function: Cosine Similarity (COS)

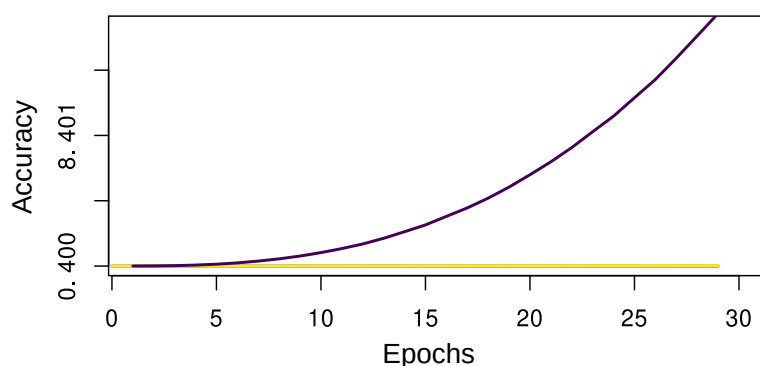

Figure S1: Accuracy of model training when projecting visitor metadata onto the latent feature space using adaptive moment estimation (Adam) optimiser with 100 epochs and a batch size of 20. Here, exploratory analysis are carried out using the Time-based decay learning rate—where the initial learning rate (0.01) decrease by 0.0001 after each epoch. Note that we also used three different cost functions during the model training: Mean Squared Error (MSE), Mean Absolute Error (MAE) and Cosine Similarity (COS) to measure the distance between the estimated latent feature space (truncated SVD) and the predicted latent feature space obtained from the regression models.

i) Cost function: Mean Squared Error (MSE)

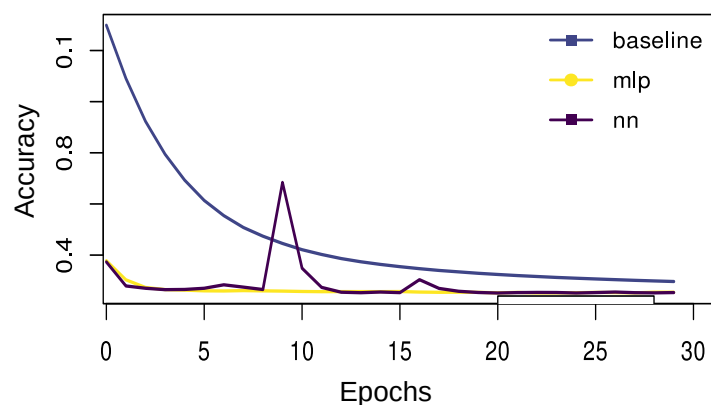

ii) Cost function: Mean Absolute Error (MAE)

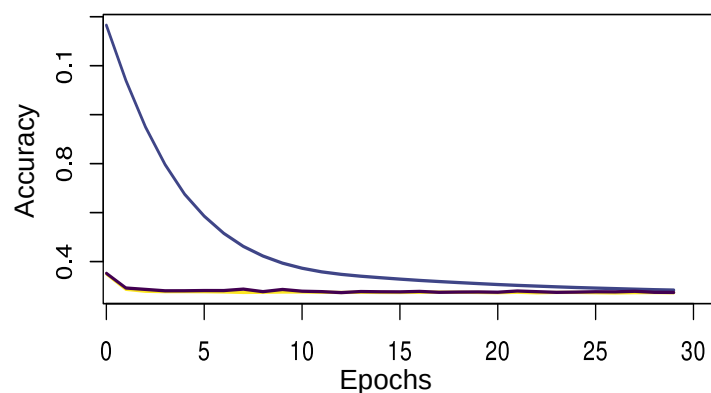

iii) Cost function: Cosine Similarity (COS)

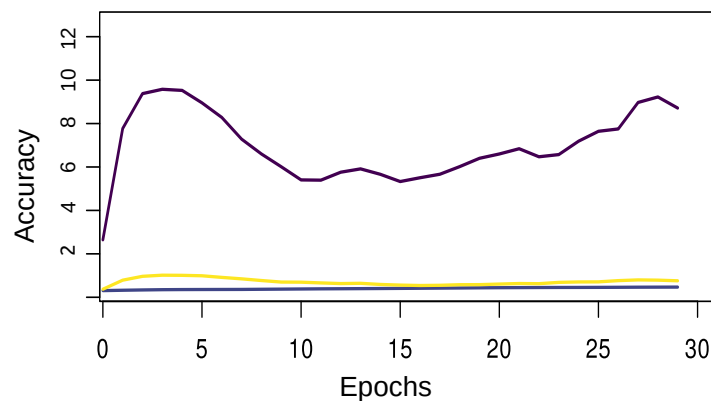

Figure S2: Accuracy of model training when projecting place metadata onto the latent feature space using adaptive moment estimation (Adam) optimiser with 100 epochs and a batch size of 20. Here, exploratory analysis are carried out using the Time-based decay learning rate—where the initial learning rate (0.01) decrease by 0.0001 after each epoch. Note that we also used three different loss functions during the model training: Mean Squared Error (MSE), Mean Absolute Error (MAE) and Cosine Similarity (COS) to measure the distance between the estimated latent feature space (truncated SVD) and the predicted latent feature space obtained from the regression models.

## 533 Predicting interaction using observed node metadata

Table S4: List of model predictions obtained using the dot product of inferred latent feature spaces (obtained from regression models)

| Model no. | Visitor  | Place    | Learning rate |
|-----------|----------|----------|---------------|
| 1A        | Baseline | Baseline | Constant      |
| 1B        | Baseline | Baseline | Time-based    |
| 2A        | Baseline | MLP      | Constant      |
| 2B        | Baseline | MLP      | Time-based    |
| 3A        | Baseline | NN       | Constant      |
| 3B        | Baseline | NN       | Time-based    |
| 4A        | MLP      | Baseline | Constant      |
| 4B        | MLP      | Baseline | Time-based    |
| 5A        | MLP      | MLP      | Constant      |
| 5B        | MLP      | MLP      | Time-based    |
| 6A        | MLP      | NN       | Constant      |
| 6B        | MLP      | NN       | Time-based    |
| 7A        | NN       | Baseline | Constant      |
| 7B        | NN       | Baseline | Time-based    |
| 8A        | NN       | MLP      | Constant      |
| 8B        | NN       | MLP      | Time-based    |
| 9A        | NN       | NN       | Constant      |
| 9B        | NN       | NN       | Time-based    |

Table S5: Accuracy of model predictions obtained from RDPG-regression framework. The table indicates the Area Under Curve (AUC) values for each model calculated using three different metrics which was used to measure the distance between the estimated latent feature spaces and the predicted latent feature space: Mean Squared Error (MSE), Mean Absolute Error (MAE) and Cosine Similarity (COS).

| Model | MSE          | MAE          | COS          |
|-------|--------------|--------------|--------------|
| 1A    | 0.495        | 0.630        | 0.511        |
| 1B    | 0.530        | 0.538        | <b>0.729</b> |
| 2A    | <b>0.733</b> | <b>0.736</b> | 0.509        |
| 2B    | 0.584        | 0.699        | 0.574        |
| 3A    | 0.584        | 0.699        | 0.574        |
| 3B    | 0.610        | 0.636        | 0.516        |
| 4A    | 0.712        | 0.645        | 0.510        |
| 4B    | 0.620        | 0.576        | 0.720        |
| 5A    | 0.668        | 0.701        | 0.532        |
| 5B    | 0.550        | 0.646        | 0.516        |
| 6A    | 0.620        | 0.665        | 0.610        |
| 6B    | 0.576        | 0.590        | 0.516        |
| 7A    | 0.632        | 0.653        | 0.515        |
| 7B    | 0.502        | 0.615        | 0.719        |
| 8A    | 0.721        | 0.699        | 0.488        |
| 8B    | 0.537        | 0.657        | 0.499        |
| 9A    | 0.500        | 0.670        | 0.570        |
| 9B    | 0.601        | 0.604        | 0.530        |

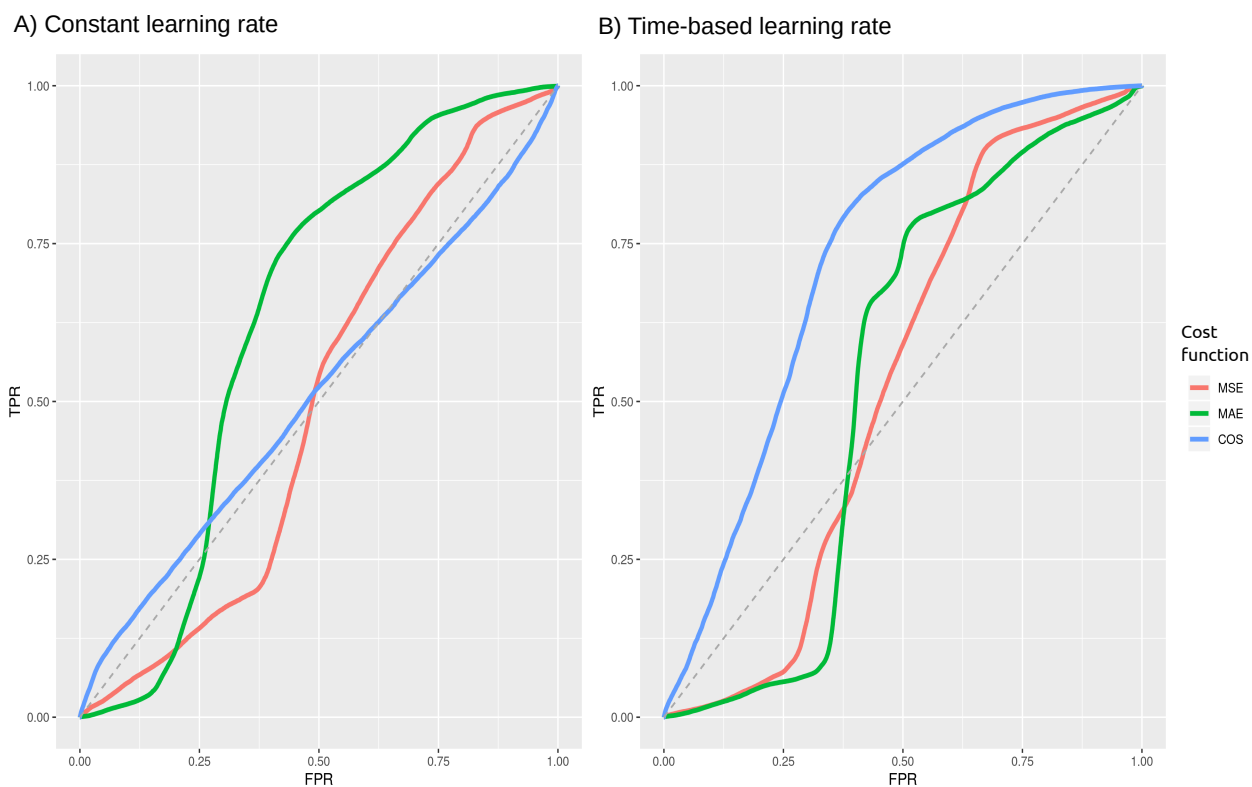

Figure S3: Measuring the performance of predictive framework using the AUC-ROC. The plot shows the accuracy of predictions obtained from the dot product in predicting interactions for the model 1 (dot product of visitor baseline and place baseline models) using A) Constant learning rate and B) Time-based learning rate. Note that rate of recovering False Positive and True Positive are both calculated at thresholds varying from 0 to 1. The dotted line indicates an  $AUC = 0.5$  where a model does not distinguish between True Positives and False Positives. We also report the model predictions obtained using different metrics: Mean Squared Error (MSE - in red), Mean Absolute Error (MAE - in green) and Cosine Similarity (COS - in blue) which measures the distance between the estimated latent feature space and the predicted latent feature spaces.



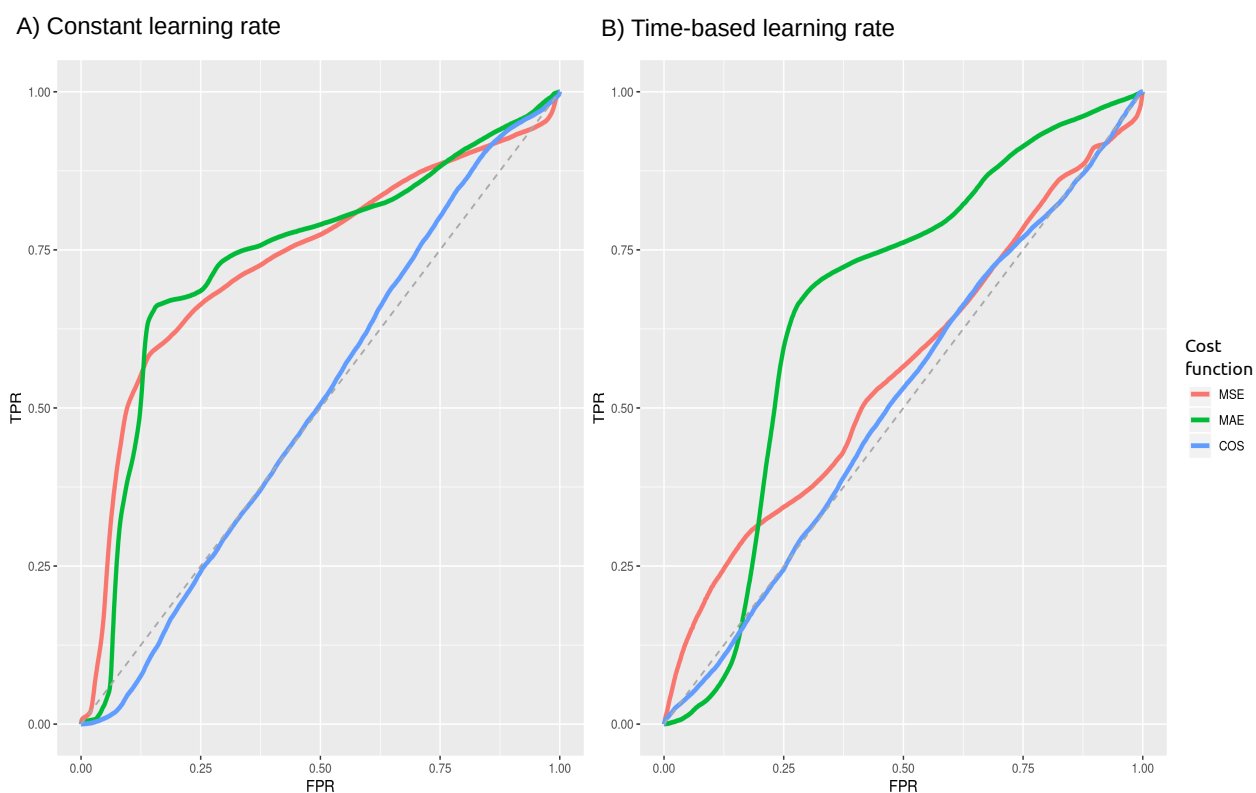

Figure S4: Measuring the performance of predictive framework using the AUC-ROC. The plot shows the accuracy of predictions obtained from the dot product in predicting interactions for the model 2 (dot product of visitor Baseline and place MLP models) using A) Constant learning rate and B) Time-based learning rate. The x-axis indicates the False Positive Rate (FPR) and y-axis indicates the True Positive Rate (TPR). Note that rate of recovering False Positive and True Positive are both calculated at thresholds varying from 0 to 1. The dotted line indicates an  $AUC = 0.5$  where a model does not distinguish between True Positives and False Positives. We also report the model predictions obtained using different metrics: Mean Squared Error (MSE - in red), Mean Absolute Error (MAE - in green) and Cosine Similarity (COS - in blue) which measures the distance between the estimated latent feature space and the predicted latent feature spaces.

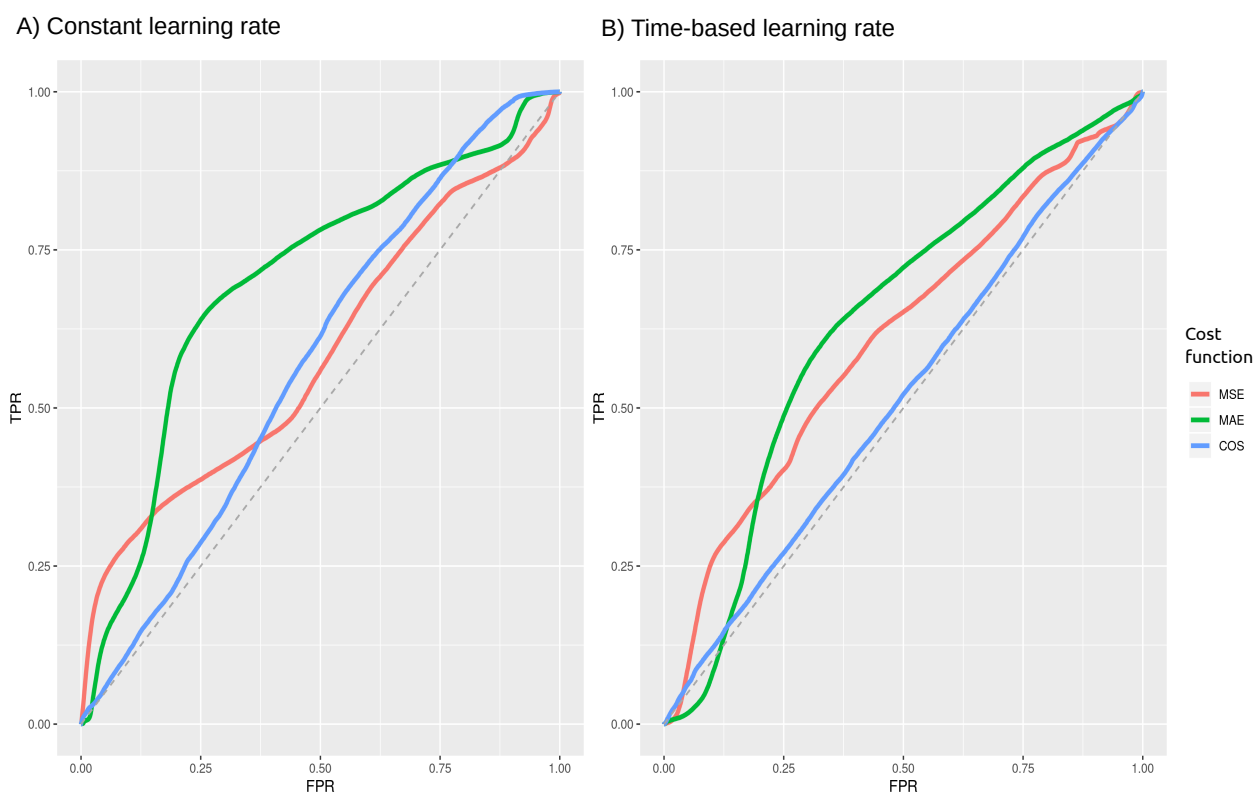

Figure S5: Measuring the performance of predictive framework using the AUC-ROC. The plot shows the accuracy of predictions obtained from the dot product in predicting interactions for the model 3 (dot product of visitor Baseline and place NN models) using A) Constant learning rate and B) Time-based learning rate. The x-axis indicates the False Positive Rate (FPR) and y-axis indicates the True Positive Rate (TPR). Note that rate of recovering False Positive and True Positive are both calculated at thresholds varying from 0 to 1. The dotted line indicates an  $AUC = 0.5$  where a model does not distinguish between True Positives and False Positives. We also report the model predictions obtained using different metrics: Mean Squared Error (MSE - in red), Mean Absolute Error (MAE - in green) and Cosine Similarity (COS - in blue) which measures the distance between the estimated latent feature space and the predicted latent feature spaces.

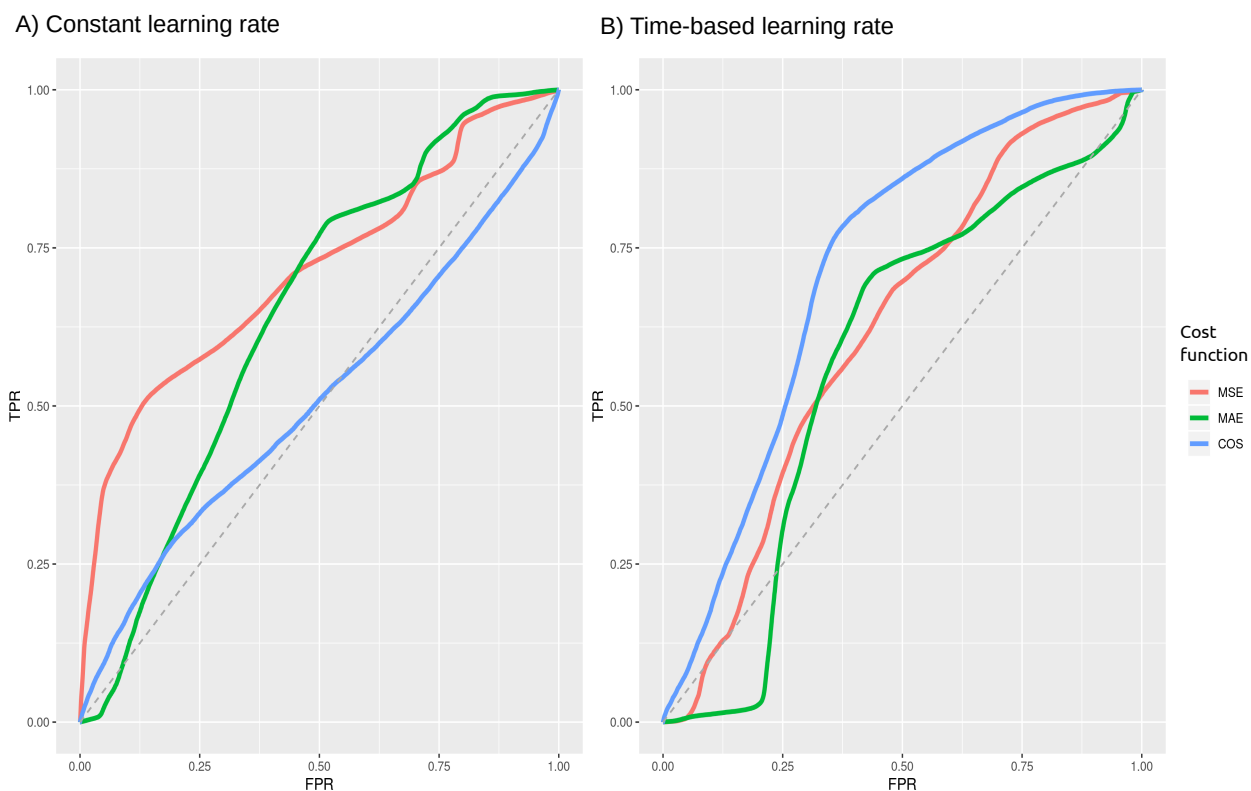

Figure S6: Measuring the performance of predictive framework using the AUC-ROC. The plot shows the accuracy of predictions obtained from the dot product in predicting interactions for the model 4 (dot product of visitor MLP and place Baseline models) using A) Constant learning rate and B) Time-based learning rate. The x-axis indicates the False Positive Rate (FPR) and y-axis indicates the True Positive Rate (TPR). Note that rate of recovering False Positive and True Positive are both calculated at thresholds varying from 0 to 1. The dotted line indicates an  $AUC = 0.5$  where a model does not distinguish between True Positives and False Positives. We also report the model predictions obtained using different metrics: Mean Squared Error (MSE - in red), Mean Absolute Error (MAE - in green) and Cosine Similarity (COS - in blue) which measures the distance between the estimated latent feature space and the predicted latent feature spaces.

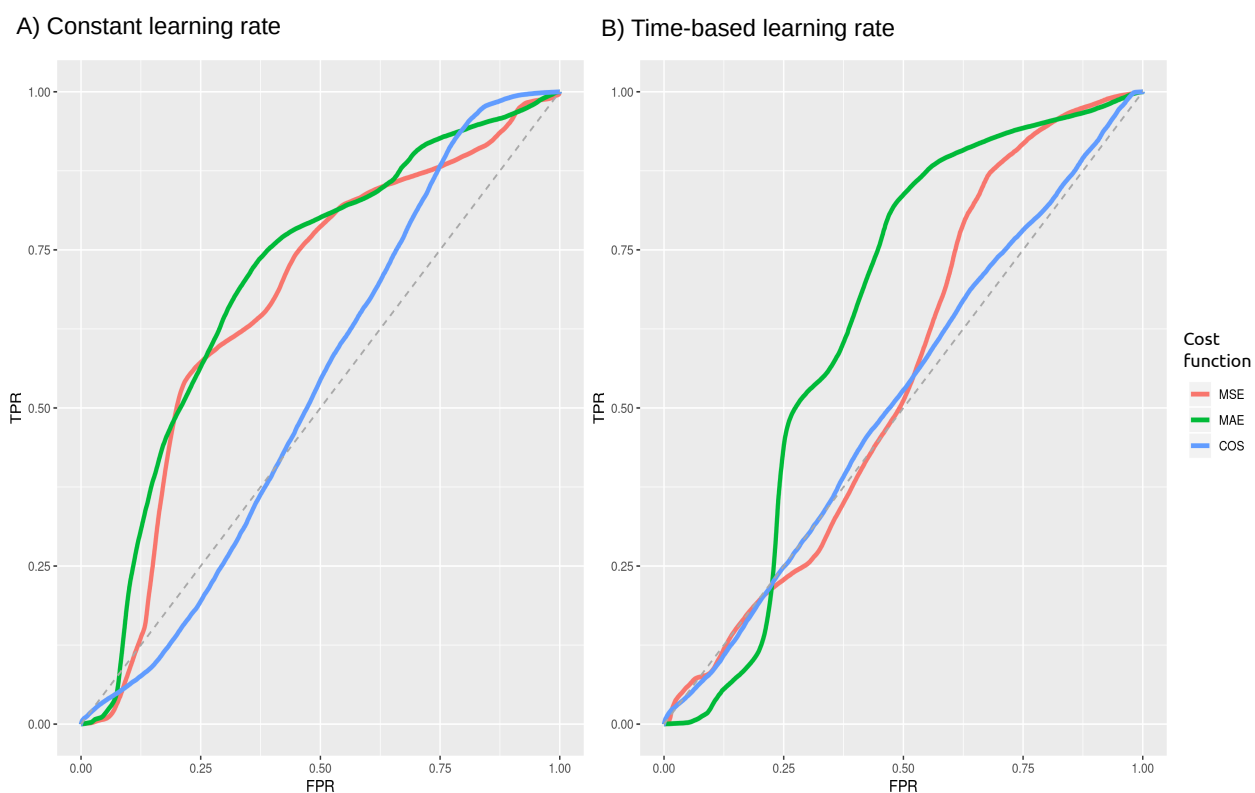

Figure S7: Measuring the performance of predictive framework using the AUC-ROC. The plot shows the accuracy of predictions obtained from the dot product in predicting interactions for the model 5 (dot product of visitor MLP and place MLP models) using A) Constant learning rate and B) Time-based learning rate. The x-axis indicates the False Positive Rate (FPR) and y-axis indicates the True Positive Rate (TPR). Note that rate of recovering False Positive and True Positive are both calculated at thresholds varying from 0 to 1. The dotted line indicates an  $AUC = 0.5$  where a model does not distinguish between True Positives and False Positives. We also report the model predictions obtained using different metrics: Mean Squared Error (MSE - in red), Mean Absolute Error (MAE - in green) and Cosine Similarity (COS - in blue) which measures the distance between the estimated latent feature space and the predicted latent feature spaces.

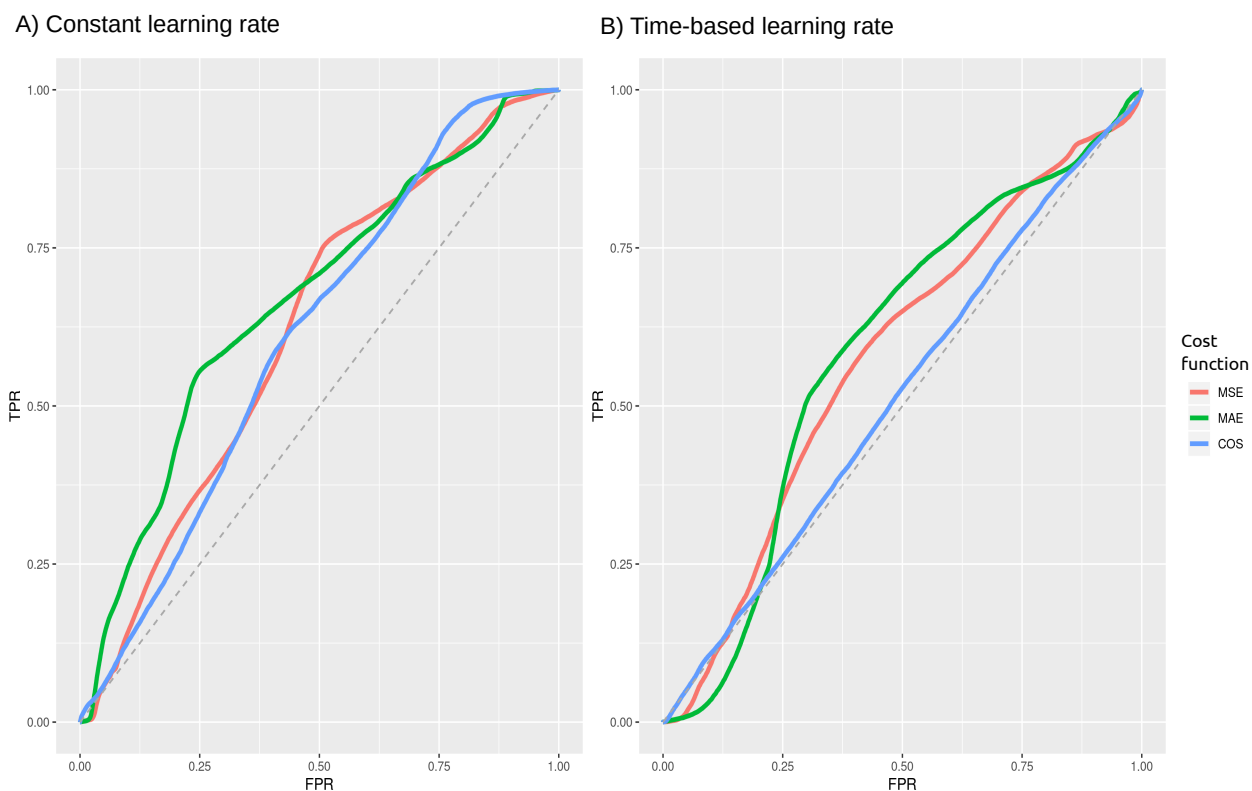

Figure S8: Measuring the performance of predictive framework using the AUC-ROC. The plot shows the accuracy of predictions obtained from the dot product in predicting interactions for the model 6 (dot product of visitor MLP and place NN models) using A) Constant learning rate and B) Time-based learning rate. The x-axis indicates the False Positive Rate (FPR) and y-axis indicates the True Positive Rate (TPR). Note that rate of recovering False Positive and True Positive are both calculated at thresholds varying from 0 to 1. The dotted line indicates an  $AUC = 0.5$  where a model does not distinguish between True Positives and False Positives. We also report the model predictions obtained using different metrics: Mean Squared Error (MSE - in red), Mean Absolute Error (MAE - in green) and Cosine Similarity (COS - in blue) which measures the distance between the estimated latent feature space and the predicted latent feature spaces.

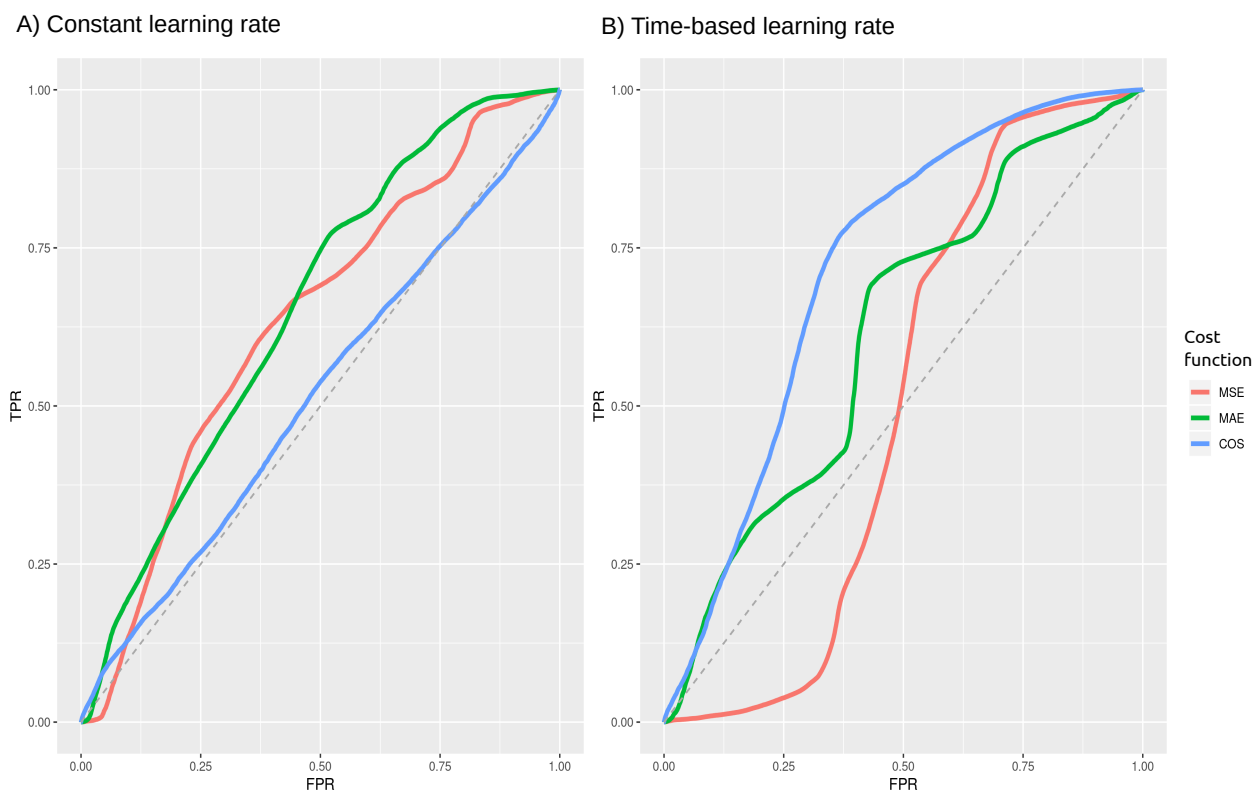

Figure S9: Measuring the performance of predictive framework using the AUC-ROC. The plot shows the accuracy of predictions obtained from the dot product in predicting interactions for the model 7 (dot product of visitor NN and place Baseline models) using A) Constant learning rate and B) Time-based learning rate. The x-axis indicates the False Positive Rate (FPR) and y-axis indicates the True Positive Rate (TPR). Note that rate of recovering False Positive and True Positive are both calculated at thresholds varying from 0 to 1. The dotted line indicates an  $AUC = 0.5$  where a model does not distinguish between True Positives and False Positives. We also report the model predictions obtained using different metrics: Mean Squared Error (MSE - in red), Mean Absolute Error (MAE - in green) and Cosine Similarity (COS - in blue) which measures the distance between the estimated latent feature space and the predicted latent feature spaces.

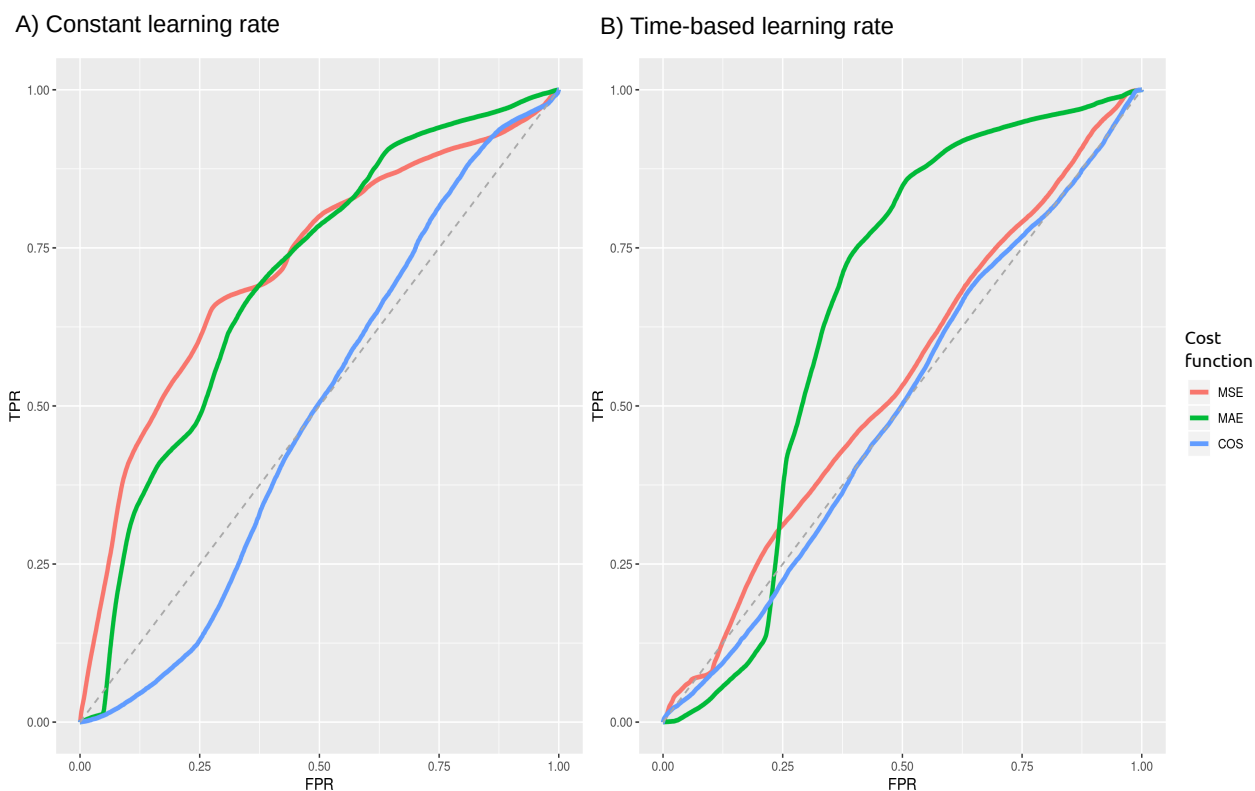

Figure S10: Measuring the performance of predictive framework using the AUC-ROC. The plot shows the accuracy of predictions obtained from the dot product in predicting interactions for the model 8 (dot product of visitor NN and place MLP models) using A) Constant learning rate and B) Time-based learning rate. The x-axis indicates the False Positive Rate (FPR) and y-axis indicates the True Positive Rate (TPR). Note that rate of recovering False Positive and True Positive are both calculated at thresholds varying from 0 to 1. The dotted line indicates an  $AUC = 0.5$  where a model does not distinguish between True Positives and False Positives. We also report the model predictions obtained using different metrics: Mean Squared Error (MSE - in red), Mean Absolute Error (MAE - in green) and Cosine Similarity (COS - in blue) which measures the distance between the estimated latent feature space and the predicted latent feature spaces.

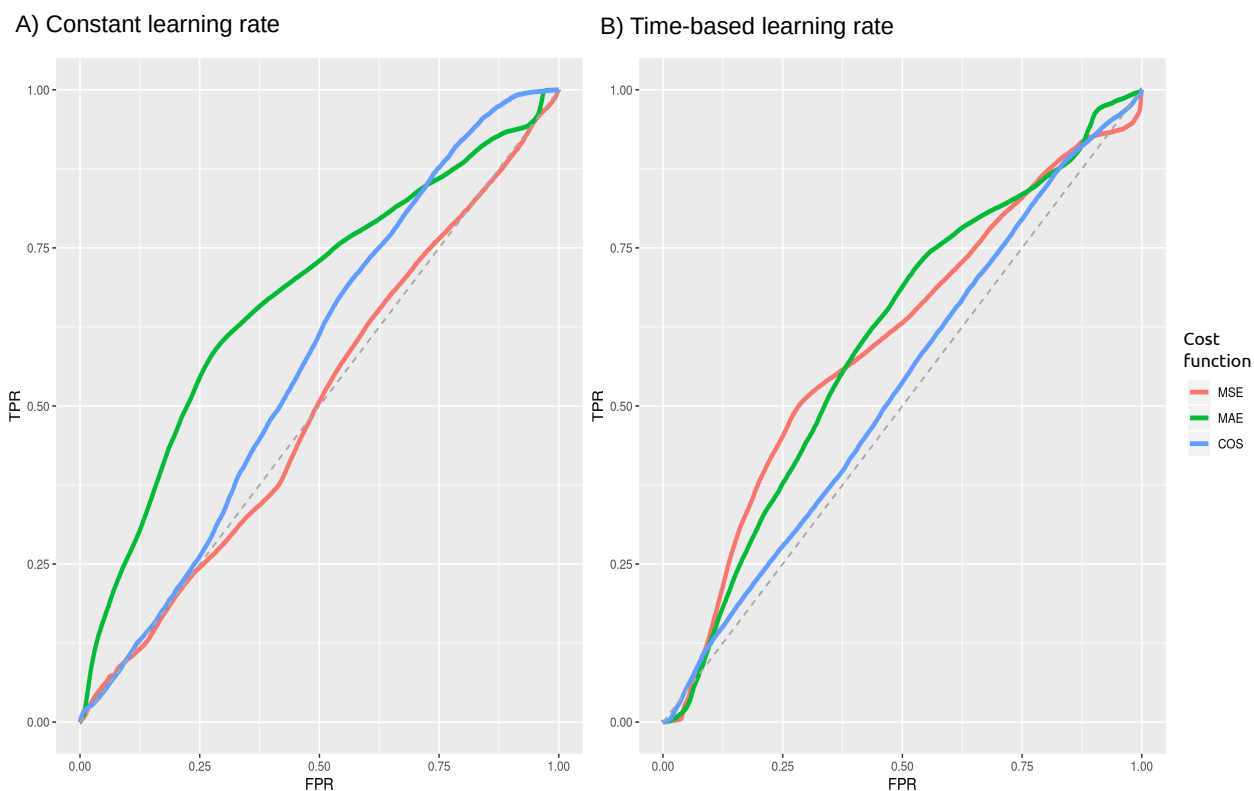

Figure S11: Measuring the performance of predictive framework using the AUC-ROC. The plot shows the accuracy of predictions obtained from the dot product in predicting interactions for the model 9 (dot product of visitor NN and place NN models) using A) Constant learning rate and B) Time-based learning rate. The x-axis indicates the False Positive Rate (FPR) and y-axis indicates the True Positive Rate (TPR). Note that rate of recovering False Positive and True Positive are both calculated at thresholds varying from 0 to 1. The dotted line indicates an  $AUC = 0.5$  where a model does not distinguish between True Positives and False Positives. We also report the model predictions obtained using different metrics: Mean Squared Error (MSE - in red), Mean Absolute Error (MAE - in green) and Cosine Similarity (COS - in blue) which measures the distance between the estimated latent feature space and the predicted latent feature spaces.
